# Supplementary material for: A novel λ integrase-mediated seamless vector transgenesis platform for therapeutic protein expression
Source: PubMed Central journal article supplement — Nucleic Acids Res. 2018 Jun 11;46(16):e99. doi: 10.1093/nar/gky500 (PMC6144826; doi:10.1093/nar/gky500), 2018-06-11
Supplement: gky500_supplemental_files.pdf [file gky500_supplemental_files.pdf]

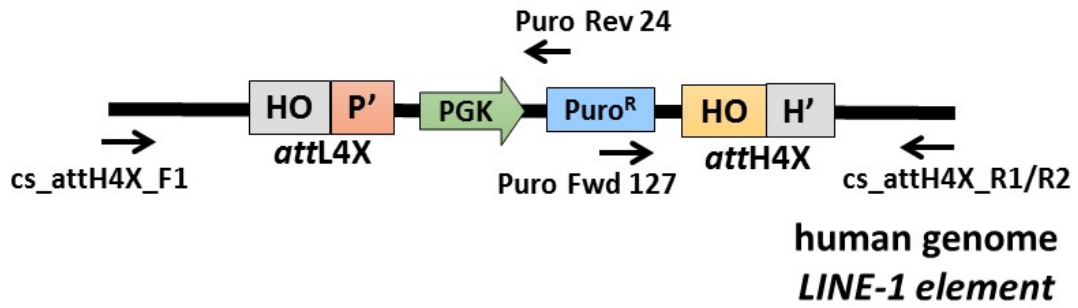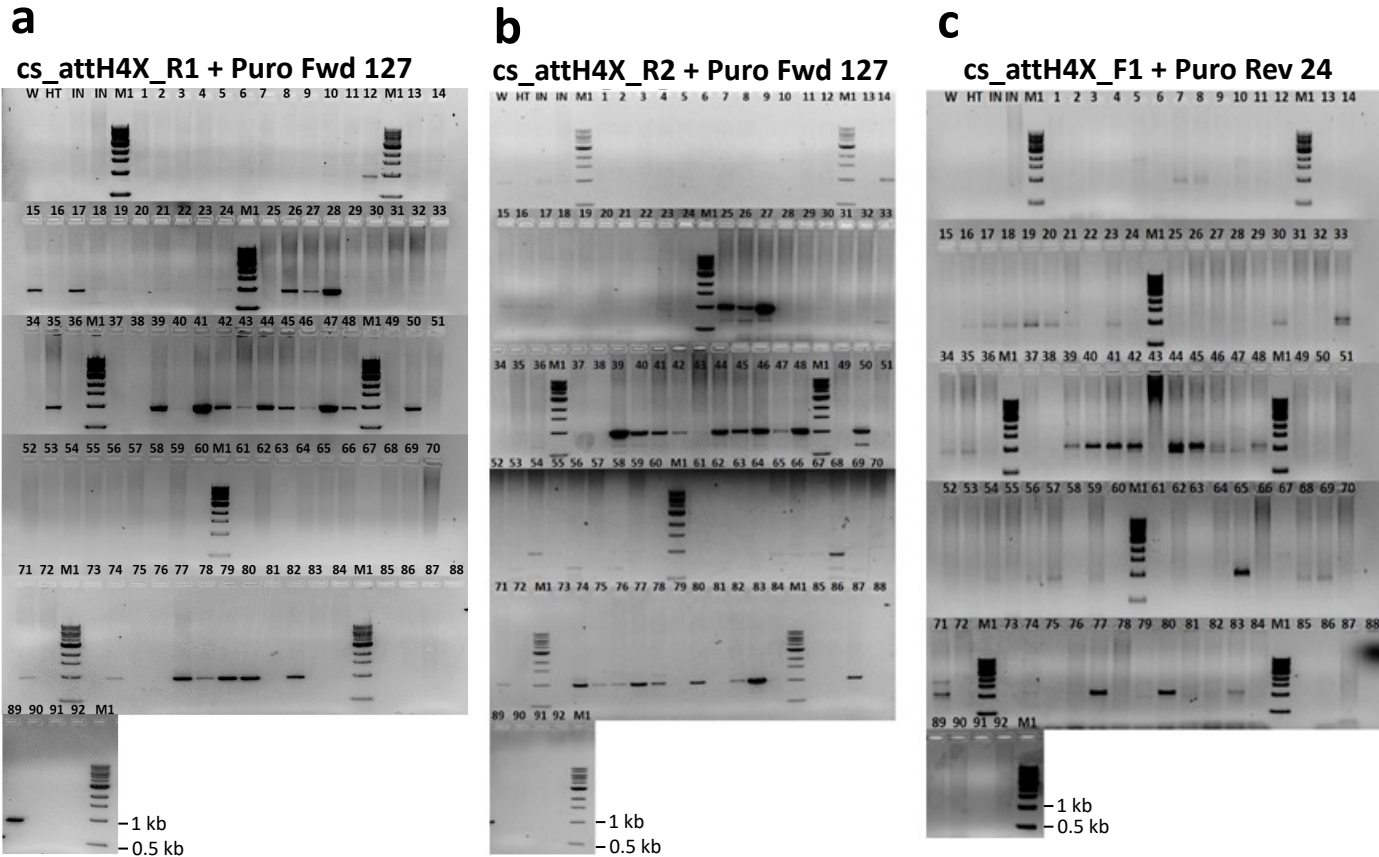

### Figure S1: Screening for *attH4X/attL4X* recombination events in HT1080 clones

PCR analysis of *attH4X* x *attL4X* recombination events using the genomic DNA from puromycin resistant clones obtained from targeting of seamless vector *attL4X-PGKssPuro* in HT1080 cells. Position of primers *cs\_attH4X\_R1*, *cs\_attH4X\_R2*, *cs\_attH4X\_F1*, Puro Fwd 127 and Puro Rev 24 to identify recombinant junctions after successful integration at *attH4X* in *LINE-1* elements are indicated. **a)** PCR screening with *cs\_attH4X\_R1* and Puro Fwd 127 (~950 bp) resulted in 32 positive clones. **b)** PCR-amplifications with *cs\_attH4X\_R2* and Puro Fwd 127 (~1000 bp) resulted in 33 positive clones. **c)** PCR with *cs\_attH4X\_F1* and Puro Rev 24 (~1100 bp) detected for 13 clones. W, no DNA template control; HT, genomic DNA from HT1080 parental cells; IN, genomic DNA from two puromycin resistant colonies obtained through co-transfection of 50ng of *attL4X-PGKssPuro* and 500ng of *pCMVssIna*; 1-92, genomic DNA from puromycin resistant clones obtained through co-transfection of 50ng of *attL4X-PGKssPuro* and 500ng of *pCMVssInt-C3CNLS*; M1, 1 kb DNA ladder.

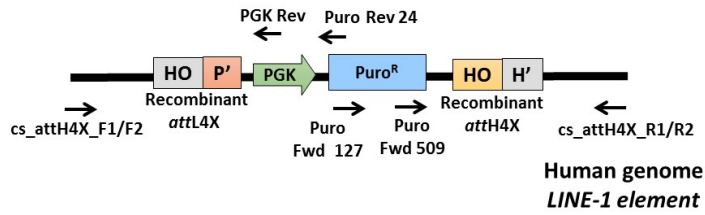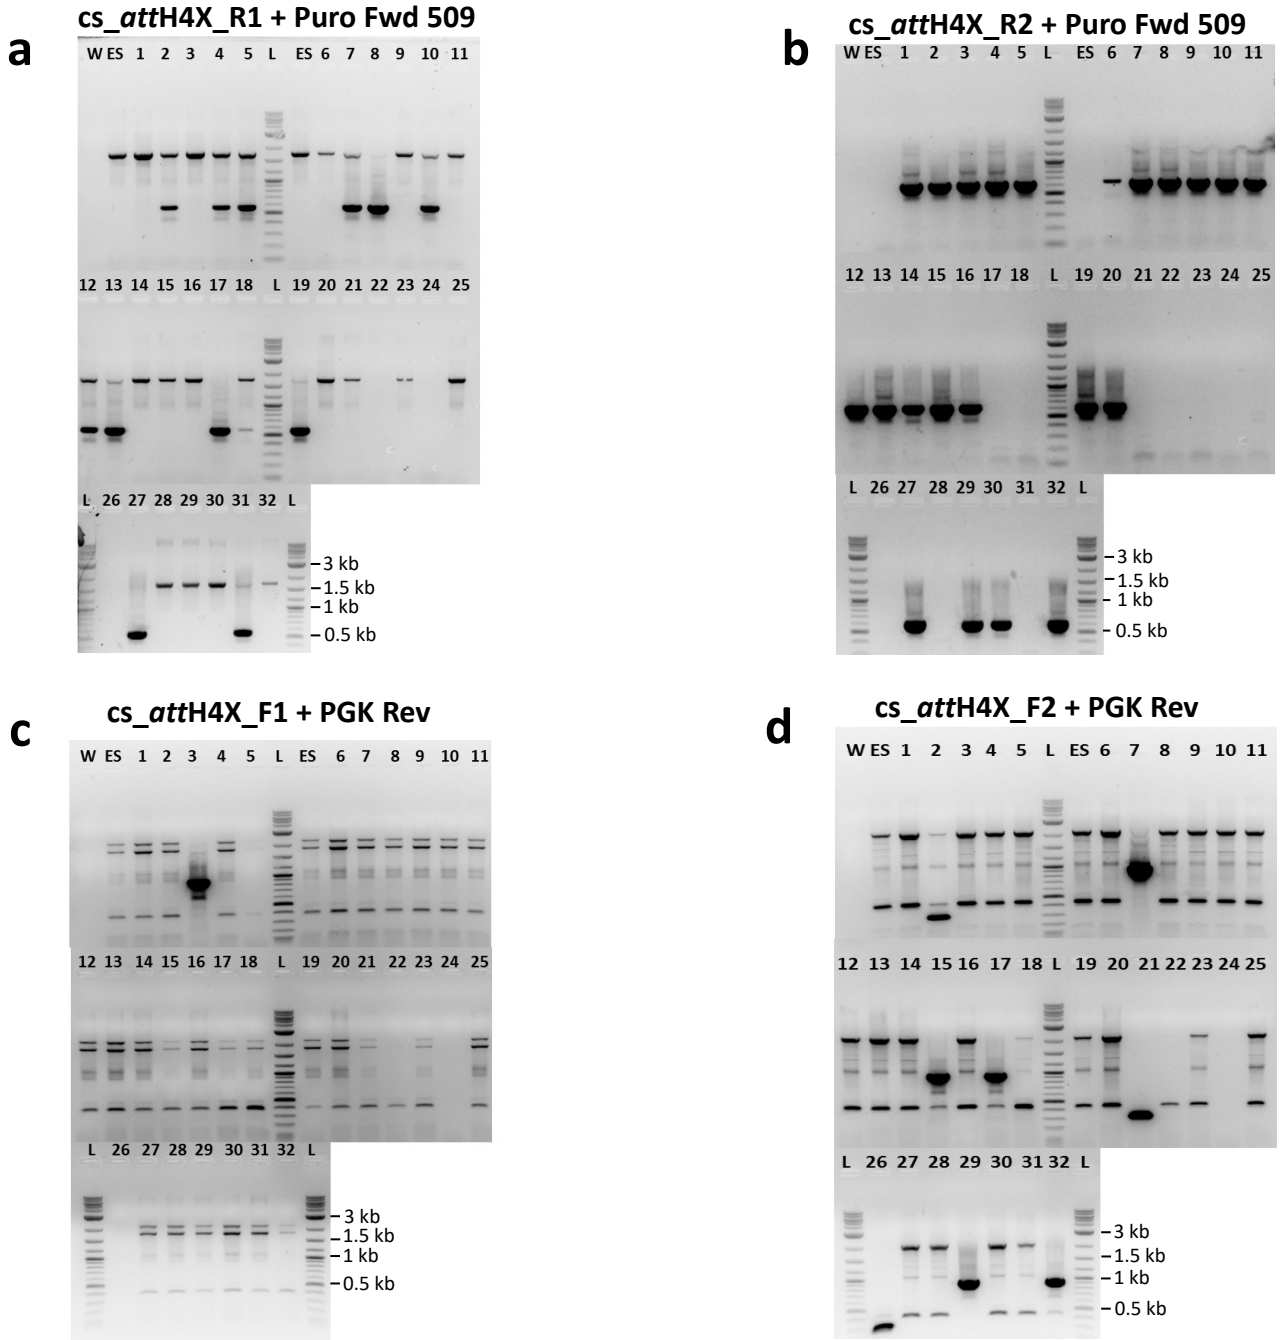

**Figure S2: Screening for *attH4X/attL4X* recombination events in hES clones**

PCR screening of *attH4X* x *attL4X* recombination events using the genomic DNA from puromycin resistant clones obtained from targeting of seamless vector *attL4X-PGKssPuro* in hESCs. Recombinant junctions at *LINE-1* elements were identified in a screen involving semi-nested PCR with primers *cs\_attH4X\_R1/R2*, *cs\_attH4X\_F1/F2*, Puro Fwd 509, PGK Rev using the genomic DNA template from primary PCR (with primers Puro Fwd 127 and Puro Rev 24) as indicated. **a**) PCR amplification with *cs\_attH4X\_R1* and Puro Fwd 509 (~600 bp) resulted in 13 positive clones. **b**) PCR-amplifications with *cs\_attH4X\_R2* and Puro Fwd 509 (~700 bp) were detected for 22 clones. **c**) PCR screening with *cs\_attH4X\_F1* and PGK Rev (~800 bp) resulted in a single positive clone. **d**) PCR screening with *cs\_attH4X\_F2* and PGK Rev (~900 bp) resulted in 6 positive clones. W, no DNA template control; ES, genomic DNA from parental hESCs; 1-32, puromycin resistant clones obtained through co-transfection of 100ng of *attL4X-PGKssPuro* and 1 $\mu$ g of *pEFssInt-C3CNLS*; 1 kb DNA ladder.

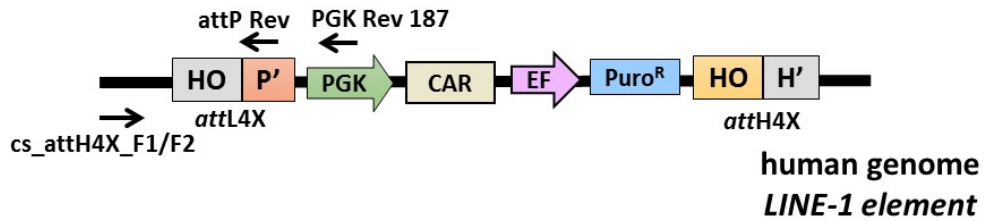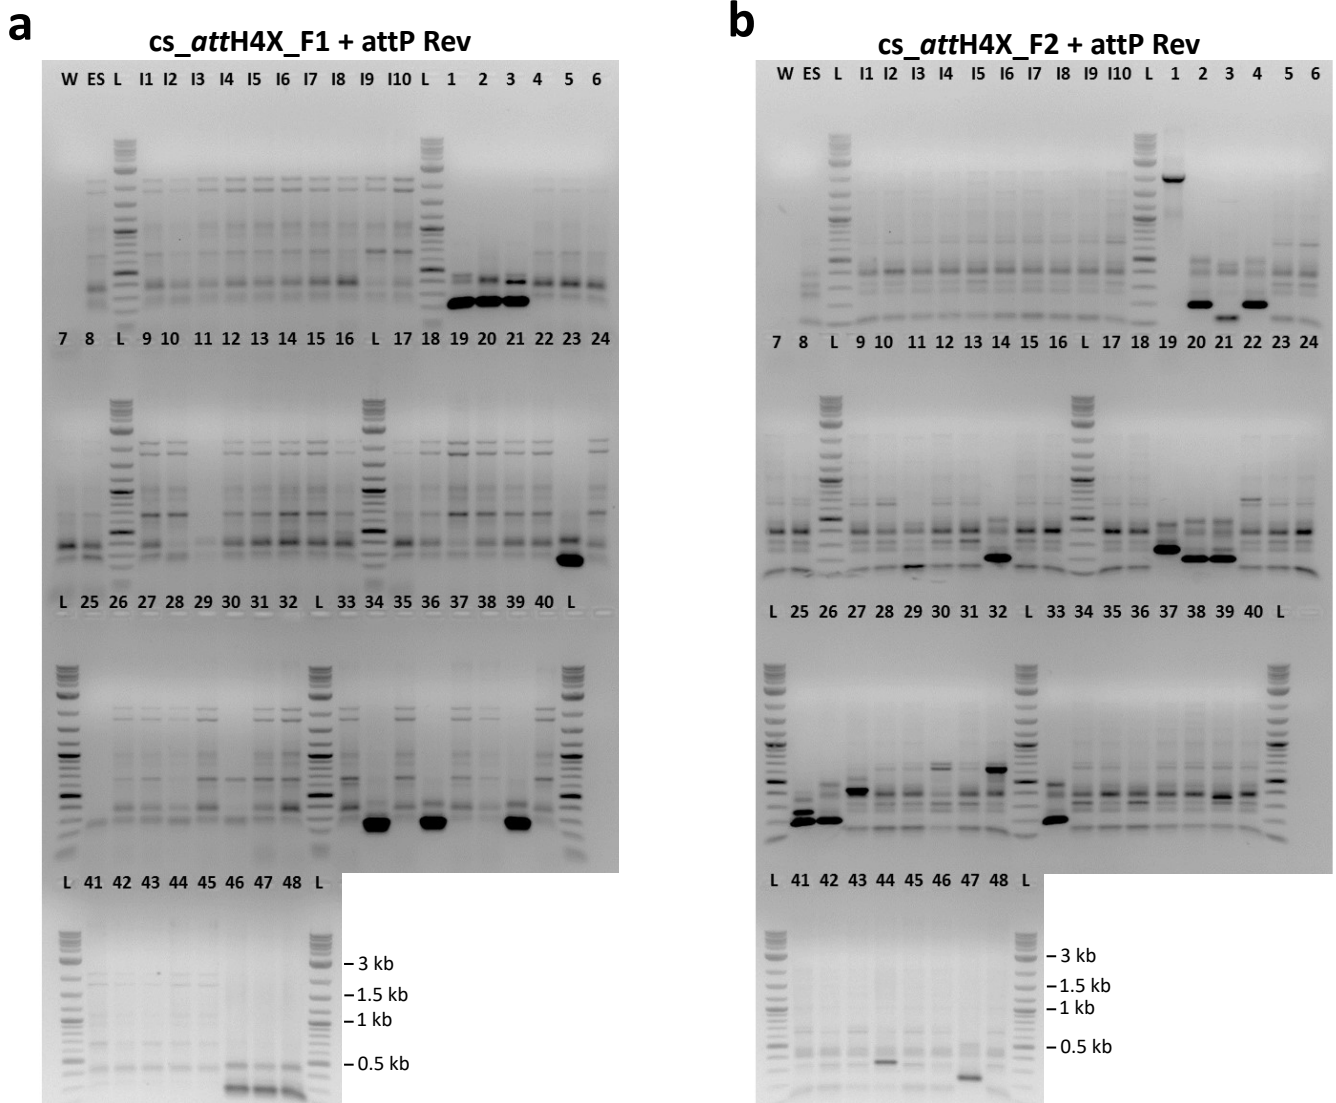

**Figure S3: Screening of *attL4X-PGKssCAR-EF-Puro* targeting at *attH4X* in hESC clones**

PCR screening of *attH4X* x *attL4X* recombination events using the genomic DNA from puromycin resistant clones obtained from targeting of seamless vector *attL4X-PGKssCAR-EF-Puro* in hESCs. Recombinant *attL4X* junction at *LINE-1* elements were identified in a screen involving semi-nested PCR with primers *cs\_attH4X\_F1*, *cs\_attH4X\_F2*, *attP Rev* using the genomic DNA template from primary PCR (with primers *PGK Rev 187*) as indicated. **a)** PCR with *cs\_attH4X\_F1* and *attP Rev* (~220bp) resulted in 10 positive clones. **b)** PCR screening with *cs\_attH4X\_F2* and *attP Rev* (~280bp) resulted in 2 positive clones. W, no DNA template control; ES, genomic DNA from parental hESCs; I1-I10, puromycin resistant clones obtained through co-transfection of 100ng of *attL4X-PGKssCAR-EF-Puro* and 500ng of *pEFssInt-INA*; 1-48, puromycin resistant clones obtained through co-transfection of 100ng of *attL4X-PGKssCAR-EF-Puro* and 500ng of *pEFssInt-C3CNLS*; L, 1 kb DNA ladder.

**Table S1: List of Primers (5'-3')**

|                           |                                                                         |
|---------------------------|-------------------------------------------------------------------------|
| PstI_EGFP                 | GTACCTGCAGCCACCATGGTGAGCAAGGGCGAGGAGC                                   |
| NotI_attH4X_NheI_bpa      | CAGTGC GGCCG CCAACTTAATGAAATAAAGCAGGCTAGCCGACTCACTATAGGGCGA<br>ATTGGAGC |
| Puro_fwd_PstI             | CCAACTGCAGATGACCGAGTACAAG                                               |
| Puro_rev_XbaI             | GACTTCTAGATCAGGCACCGGGCTTGCGG                                           |
| CAR_fwd_NcoI              | CCACCATGGCCTTACCAGTGACCGC                                               |
| CAR_rev_XbaI              | GATATCTAGATTAGCGAGGGGGCAGGGCCTGCATG                                     |
| HR_NheI_EF fwd            | CGCCCTATAGTGAGTCGGCTAGCGGCTCCGGTGCCCGTCAGTG                             |
| HR_NheI_Bgh rev           | CTTAATGAAATAAAGCAGGCTAGCGCCGCTACAGGGCGCGTGGGGAT                         |
| Puro fwd_BamHI_HR         | GTAAGCTTGGTACCGAGCTCGGATCCCCACCATGACCGAGTACAAGCCCACGG                   |
| Puro rev_EcoRI_HR         | GGCTGATCAGCGAGCTAGTGAATTCTCAGGCACCGGGCTTGCGGGTC                         |
| cs_attH4X_F1              | GAGTGTTTTCCA ACTTGGTTCCATT                                              |
| cs_attH4X_R1              | AAAACACAGCACGAGA ACTTCGTGA                                              |
| cs_attH4X_F2              | CCTGTCTTGCTAGGTTGGGAAGT                                                 |
| cs_attH4X_R2              | TAGAGGAATTGCTAACTAGAATAACCA                                             |
| Puro Fwd 127              | GAGCTGCAAGA ACTCTTCCTCAC                                                |
| Biotinylated Puro Fwd 127 | Biotin-GAGCTGCAAGA ACTCTTCCTCAC                                         |
| Puro Rev 24               | CACCGTGGGCTTGTACTCGGTC                                                  |
| PETF2-PH                  | PHOSPO-CATCGGTGATGTCGGCGATAT                                            |
| Puro Fwd 128              | CAACAGATGGAAGGCTCCTGG                                                   |
| petF2RC                   | ATATCGCCGACATCACCGATG                                                   |
| bpa1                      | GGACAGCAAGGGGGAGGATTG                                                   |
| PGK_rev                   | CAGGTGAATATCAAATCCTCCTCG                                                |
| Puro Fwd 509              | CTACGAGCGGCTCGGCTTCACC                                                  |
| PGK Rev 187               | CTGACTAGGGGAGGAGTAGAAGTGG                                               |
| attP_Rev                  | GACTGATAGTGACCTGTTGTTGTC                                                |

**Table S2: List of genomic coordinates and locations of targeted *attH4X* in corresponding *LINE-1* in HT1080 bulk cultures identified using different primer pairs**

| <b>Samples</b>                              | <b>Genomic coordinates</b>   | <b>Genomic locations</b> | <b><i>LINE-1</i> elements</b> |
|---------------------------------------------|------------------------------|--------------------------|-------------------------------|
| <b>Primers: cs_attH4X_R1 + Puro Fwd 127</b> |                              |                          |                               |
| C3_50                                       | chr20:14027192-14027288      | Intron of MACROD2 gene   | L1PA10                        |
| C3_100                                      | chr18:3698874-3698964        | Intron of DLGAP1 gene    | L1PA7                         |
| C3_200                                      | chr20:14027192-14027288      | Intron of MACROD2 gene   | L1PA10                        |
| <b>Primers: cs_attH4X_R2 + Puro Fwd 127</b> |                              |                          |                               |
| C3_50                                       | chr3:115752168-115752305     | Intergenic               | L1PA7                         |
| C3_100                                      | chr3:115752168-115752305     | Intergenic               | L1PA7                         |
| C3_200                                      | chr14:25137990-25138154      | Intergenic               | L1P3                          |
| <b>Primers: cs_attH4X_F1 + Puro Rev 24</b>  |                              |                          |                               |
| C3_50                                       | chr7:36257488-36257573       | Intron of EEPD1 gene     | L1PA7                         |
| C3_100                                      | chr10:44267991-44268090      | Intergenic               | L1P2                          |
| C3_200                                      | chr7:36257468-36257573       | Intron of EEPD1 gene     | L1PA7                         |
| <b>Primers: cs_attH4X_F2 + Puro Rev 24</b>  |                              |                          |                               |
| C3_50                                       | Insufficient sequencing data |                          |                               |
| C3_100                                      | chr3:17450647-17450731       | Intron of TBC1D5 gene    | L1P3                          |
| C3_200                                      | chr15:38572194-38572340      | Intergenic               | L1PA7                         |

**Table S3: List of genomic coordinates and locations of targeted *attH4X* in corresponding *LINE-1* in HT1080 clones identified using different primer pairs**

| Clone #                                     | Genomic coordinates          | Genomic locations       | <i>LINE-1</i> elements |
|---------------------------------------------|------------------------------|-------------------------|------------------------|
| <b>Primers: cs_attH4X_R1 + Puro Fwd 127</b> |                              |                         |                        |
| 10                                          | Insufficient sequencing data |                         |                        |
| 12                                          | chr7:94821074-94821150       | Intergenic              | L1PA7                  |
| 15                                          | chr17:35525040-35525120      | Intron of SLFN12L gene  | L1PA7                  |
| 17                                          | chr7:54854768-54854843       | Intergenic              | L1PA7                  |
| 18                                          | Insufficient sequencing data |                         |                        |
| 19                                          | Insufficient sequencing data |                         |                        |
| 21                                          | chr3:66311241-66311321       | Intron of SLC25A26 gene | L1PA8                  |
| 22                                          | chr7:143585724-143585804     | Intergenic              | L1P3                   |
| 24                                          | Insufficient sequencing data |                         |                        |
| 26                                          | chr4:60158615-60158695       | Intergenic              | L1PA7                  |
| 27                                          | chr1:230475395-230475453     | Intergenic              | L1PA7                  |
| 28                                          | chr4:60158619-60158695       | Intergenic              | L1PA7                  |
| 35                                          | chr2:58169727-58169815       | Intron of FANCL gene    | L1P2                   |
| 39                                          | chr17:35525032-35525120      | Intron of SLFN12L gene  | L1PA7                  |
| 41                                          | chr1:113574938-113575026     | Intron of MAGI3         | L1PA8                  |
| 42                                          | chr17:35525040-35525120      | Intron of SLFN12L gene  | L1PA7                  |
| 43                                          | chr2:224486485-224486529     | Intron of CUL3 gene     | L1P3                   |
| 44                                          | chr3:66311241-66311285       | Intron of SLC25A26 gene | L1PA8                  |
| 45                                          | chr3:156067904-156067987     | Intergenic              | L1PA7                  |
| 46                                          | chr17:35302490-35302566      | Intergenic              | L1PA7                  |
| 47                                          | chr2:224486454-224486529     | Intron of CUL3 gene     | L1P3                   |
| 48                                          | chr17:35302490-35302566      | Intergenic              | L1PA7                  |
| 50                                          | chr10:47432585-47432662      | Intergenic              | L1PA6                  |
| 59                                          | chr1:183683917-183683997     | Intron of RGL1 gene     | L1PA7                  |
| 71                                          | chr14:54406591-54406666      | Intron of CDKN3 gene    | L1P2                   |
| 74                                          | chr17:66156714-66156794      | Intron of CEP112 gene   | L1PA7                  |
| 77                                          | chr2:232036264-232036346     | Intron of DIS3L2 gene   | L1PA7                  |
| 78                                          | chr7:82491494-82491569       | Intergenic              | L1P2                   |
| 79                                          | chr11:10424843-10424917      | Intergenic              | L1PA7                  |
| 80                                          | chr3:169414717-169414803     | Intron of MECOM gene    | L1P3                   |
| 82                                          | chr3:169414720-169414795     | Intron of MECOM gene    | L1P3                   |
| 89                                          | chr2:58169739-58169815       | Intron of FANCL gene    | L1P2                   |
| <b>Primers: cs_attH4X_R2 + Puro Fwd 127</b> |                              |                         |                        |
| 14                                          | chr3:157803268- 157803384    | Intergenic              | L1PA7                  |

|                                            |                              |                           |       |
|--------------------------------------------|------------------------------|---------------------------|-------|
| 15                                         | Insufficient sequencing data |                           |       |
| 17                                         | chr7:54854762-54854913       | Intergenic                | L1PA7 |
| 25                                         | chr3:817798-817909           | Intron of LINC01266 gene  | L1PA7 |
| 26                                         | chr7:116744329-116744459     | Intron of MET gene        | L1PA7 |
| 27                                         | chr1:230475373-230475514     | Intergenic                | L1PA7 |
| 39                                         | chrX:44254389-44254542       | Intron of EFHC2 gene      | L1PA7 |
| 40                                         | chr3:25361222-25361370       | Intron of RARB gene       | L1PA7 |
| 41                                         | chr1:113574929-113575086     | Intron of MAGI3 gene      | L1PA8 |
| 42                                         | chr2:6903558-6903715         | Intergenic                | L1PA7 |
| 44                                         | chr3:125997822-125997973     | Intergenic                | L1P2  |
| 45                                         | chr3:156067904-156068021     | Intergenic                | L1PA7 |
| 46                                         | chr17:35302459-35302575      | Intergenic                | L1PA7 |
| 47                                         | chr17:35302465-35302575      | Intergenic                | L1PA7 |
| 48                                         | chr17:35302459-35302580      | Intergenic                | L1PA7 |
| 50                                         | chr2:150193440-150193595     | Intron of AC016682.1      | L1PA7 |
| 52                                         | chr6:23431503-23431654       | Intergenic                | L1PA8 |
| 54                                         | chr12:101061624-101061772    | Intron of ANO4 gene       | L1PA7 |
| 59                                         | chr1:183683908-183684064     | Intron of RGL1 gene       | L1PA7 |
| 65                                         | Insufficient sequencing data |                           |       |
| 66                                         | Insufficient sequencing data |                           |       |
| 67                                         | chr2:210446661-210446782     | Intron of LANCL1-AS1 gene | L1PA7 |
| 68                                         | chrX:73893782-73893936       | Intergenic                | L1PA7 |
| 71                                         | chr1:183683908-183684062     | Intron of RGL1 gene       | L1PA7 |
| 74                                         | chr10:31567543-31567656      | Intergenic                | L1PA7 |
| 75                                         | chr10:56762675-56762703      | Intergenic                | L1M4  |
| 76                                         | chr3:157803265-157803418     | Intergenic                | L1PA7 |
| 77                                         | chr2:232036264-232036422     | Intron of DIS3L2 gene     | L1PA7 |
| 78                                         | chr7:82491485-82491620       | Intergenic                | L1P2  |
| 80                                         | chr3:169414652-169414804     | Intron of MECOM gene      | L1P3  |
| 82                                         | chr3:169414655-169414804     | Intron of MECOM gene      | L1P3  |
| 83                                         | chr3:157803265-157803416     | Intergenic                | L1PA7 |
| 87                                         | chr12:88438242-88438391      | Intergenic                | L1PA7 |
| <b>Primers: cs_attH4X_F1 + Puro Rev 24</b> |                              |                           |       |
| 27                                         | chr1:230475281-230475380     | Intergenic                | L1PA7 |
| 39                                         | chrX:44254535-44254610       | Intron of EFHC2 gene      | L1PA7 |
| 40                                         | chr2:39812312-39812427       | Intergenic                | L1PA7 |
| 41                                         | chr1:113574820-113574937     | Intron of MAGI3 gene      | L1PA8 |
| 42                                         | chr2:6903466-6903566         | Intergenic                | L1PA7 |
| 44                                         | chr3:125997966-125998072     | Intergenic                | L1P2  |

|    |                          |                      |       |
|----|--------------------------|----------------------|-------|
| 45 | chr3:156067809-156067893 | Intergenic           | L1PA7 |
| 46 | chr17:35302567-35302667  | Intergenic           | L1PA7 |
| 48 | chr17:35302567-35302679  | Intergenic           | L1PA7 |
| 65 | chr3:1033771-1033879     | Intergenic           | L1PA8 |
| 71 | chr6:80613523-80613618   | Intergenic           | L1PA6 |
| 77 | chr7:36257468-36257573   | Intron of EEPD1 gene | L1PA7 |
| 80 | chr3:169414796-169414904 | Intron of MECOM gene | L1P3  |



**Table S4: List of genomic coordinates of the targeted *attH4X* in HT1080 bulk culture along with their frequency of occurrence obtained using deep paired-end sequencing**

| <b>Chromosome</b> | <b>Start</b> | <b>End</b> | <b>Counts</b> |
|-------------------|--------------|------------|---------------|
| 10                | 47432566     | 47432842   | 14116         |
| 5                 | 37655668     | 37655966   | 3562          |
| 11                | 86542419     | 86542586   | 3223          |
| 1                 | 210886727    | 210886826  | 312           |
| X                 | 104143467    | 104143534  | 234           |
| 2                 | 224486415    | 224486548  | 125           |
| 3                 | 137376024    | 137376055  | 115           |
| 1                 | 107845629    | 107845731  | 94            |
| 1                 | 205900757    | 205900858  | 88            |
| X                 | 132864468    | 132864513  | 80            |
| 9                 | 15050823     | 15050879   | 66            |
| 12                | 33493949     | 33494006   | 65            |
| 3                 | 67541275     | 67541444   | 62            |
| 3                 | 156067893    | 156067992  | 57            |
| 12                | 102493125    | 102493166  | 56            |
| 3                 | 96092506     | 96092604   | 52            |
| 2                 | 58169733     | 58169815   | 50            |
| 3                 | 169414716    | 169414795  | 50            |
| 7                 | 17353179     | 17353266   | 50            |
| 18                | 7712701      | 7712801    | 45            |
| 3                 | 151886483    | 151886577  | 42            |
| Y                 | 19661244     | 19661283   | 41            |
| 10                | 109547670    | 109547704  | 40            |
| 11                | 3269140      | 3269321    | 40            |
| GL000213.1        | 22304        | 22340      | 39            |
| 7                 | 133969091    | 133969162  | 36            |
| 14                | 22687362     | 22687421   | 33            |
| 11                | 63394044     | 63394123   | 32            |
| 5                 | 157722276    | 157722356  | 32            |
| 12                | 97866922     | 97866956   | 31            |
| 7                 | 94821074     | 94821154   | 31            |
| 1                 | 157346999    | 157347052  | 29            |
| 1                 | 104058375    | 104058472  | 27            |

|    |           |           |    |
|----|-----------|-----------|----|
| 5  | 6648494   | 6648592   | 26 |
| 1  | 65742930  | 65742968  | 23 |
| 5  | 90032846  | 90032926  | 23 |
| 3  | 87652598  | 87652653  | 20 |
| 5  | 72981677  | 72981777  | 20 |
| 7  | 94968892  | 94968972  | 20 |
| 1  | 74015741  | 74015800  | 19 |
| 13 | 97594574  | 97594642  | 19 |
| 13 | 48395563  | 48395662  | 18 |
| 12 | 80082999  | 80083088  | 17 |
| 15 | 49006499  | 49006529  | 17 |
| 1  | 169409192 | 169409301 | 15 |
| 13 | 19653740  | 19653819  | 15 |
| 3  | 66894359  | 66894441  | 15 |
| 3  | 164162167 | 164162247 | 15 |
| 7  | 7392706   | 7392806   | 15 |
| X  | 56195456  | 56195495  | 15 |
| X  | 57272103  | 57272162  | 15 |
| 1  | 104587615 | 104587780 | 14 |
| 4  | 120510442 | 120510519 | 14 |
| X  | 131657562 | 131657608 | 14 |
| X  | 139064922 | 139065002 | 14 |
| 6  | 101063329 | 101063409 | 13 |
| 7  | 18011687  | 18011843  | 13 |
| 7  | 97052219  | 97052319  | 13 |
| 13 | 112815802 | 112815927 | 12 |
| 2  | 159823285 | 159823360 | 12 |
| 21 | 46631673  | 46631755  | 12 |
| X  | 67831307  | 67831343  | 12 |
| 12 | 63338237  | 63338266  | 11 |
| 2  | 112613731 | 112613770 | 11 |
| 1  | 230475381 | 230475453 | 10 |
| 12 | 88438302  | 88438404  | 10 |
| 13 | 28782949  | 28783027  | 10 |
| 13 | 42451916  | 42451996  | 10 |
| 4  | 55168854  | 55168933  | 10 |

|            |           |           |    |
|------------|-----------|-----------|----|
| 6          | 70805252  | 70805286  | 10 |
| 1          | 210963630 | 210963703 | 9  |
| 11         | 49964843  | 49964882  | 9  |
| 14         | 54406590  | 54406670  | 9  |
| 17         | 35525040  | 35525120  | 9  |
| 18         | 8150379   | 8150477   | 9  |
| 2          | 48301703  | 48301783  | 9  |
| 5          | 162328591 | 162328667 | 9  |
| 7          | 121292246 | 121292348 | 9  |
| 15         | 76097854  | 76097898  | 8  |
| 4          | 124013145 | 124013175 | 8  |
| 4          | 160341227 | 160341303 | 8  |
| 8          | 110255556 | 110255618 | 8  |
| 8          | 119378032 | 119378094 | 8  |
| 1          | 100821321 | 100821351 | 7  |
| 12         | 101061615 | 101061695 | 7  |
| 4          | 129054501 | 129054551 | 7  |
| 7          | 21928644  | 21928715  | 7  |
| KI270728.1 | 1154641   | 1154677   | 7  |
| X          | 76381100  | 76381131  | 7  |
| X          | 117466937 | 117466996 | 7  |
| 1          | 174710046 | 174710098 | 6  |
| 10         | 91645492  | 91645572  | 6  |
| 3          | 133735635 | 133735717 | 6  |
| 4          | 127076083 | 127076145 | 6  |
| 6          | 106406212 | 106406289 | 6  |
| 8          | 65381296  | 65381361  | 6  |
| X          | 21546258  | 21546334  | 6  |
| X          | 43726512  | 43726618  | 6  |
| X          | 57745517  | 57745556  | 6  |
| X          | 112182436 | 112182578 | 6  |
| Y          | 14270975  | 14271004  | 6  |
| Y          | 18957360  | 18957395  | 6  |
| 11         | 110849041 | 110849087 | 5  |
| 11         | 110849113 | 110849266 | 5  |
| 18         | 44365737  | 44365816  | 5  |

|    |           |           |   |
|----|-----------|-----------|---|
| 2  | 175913051 | 175913206 | 5 |
| 2  | 212056109 | 212056189 | 5 |
| 21 | 14622503  | 14622533  | 5 |
| 4  | 20721077  | 20721108  | 5 |
| 4  | 174619360 | 174619541 | 5 |
| 5  | 126087347 | 126087376 | 5 |
| 8  | 69281522  | 69281599  | 5 |
| 8  | 106562303 | 106562382 | 5 |
| 9  | 78055601  | 78055630  | 5 |
| 10 | 75577221  | 75577300  | 4 |
| 12 | 90754213  | 90754277  | 4 |
| 12 | 94065653  | 94065705  | 4 |
| 12 | 112157957 | 112157999 | 4 |
| 14 | 37489209  | 37489378  | 4 |
| 18 | 70238091  | 70238130  | 4 |
| 2  | 101458962 | 101458992 | 4 |
| 3  | 3890347   | 3890418   | 4 |
| 3  | 66311241  | 66311295  | 4 |
| 3  | 121263557 | 121263723 | 4 |
| 4  | 100867544 | 100867574 | 4 |
| 6  | 122987530 | 122987610 | 4 |
| 7  | 11390351  | 11390423  | 4 |
| 8  | 48168112  | 48168142  | 4 |
| 9  | 104704788 | 104704871 | 4 |
| X  | 39543352  | 39543502  | 4 |
| X  | 54846100  | 54846213  | 4 |
| X  | 65893404  | 65893434  | 4 |
| X  | 93662021  | 93662101  | 4 |
| 1  | 92254099  | 92254179  | 3 |
| 1  | 173030869 | 173030919 | 3 |
| 10 | 64809195  | 64809267  | 3 |
| 10 | 108695078 | 108695158 | 3 |
| 10 | 109338348 | 109338377 | 3 |
| 11 | 48452541  | 48452580  | 3 |
| 12 | 20335360  | 20335429  | 3 |
| 13 | 42775696  | 42775751  | 3 |

|    |           |           |   |
|----|-----------|-----------|---|
| 13 | 49881048  | 49881124  | 3 |
| 13 | 112815595 | 112815726 | 3 |
| 19 | 32786675  | 32786705  | 3 |
| 2  | 62621158  | 62621289  | 3 |
| 2  | 72299236  | 72299271  | 3 |
| 2  | 189891984 | 189892064 | 3 |
| 20 | 18940603  | 18940682  | 3 |
| 3  | 14193528  | 14193567  | 3 |
| 3  | 29984162  | 29984238  | 3 |
| 3  | 132745905 | 132745935 | 3 |
| 3  | 132958085 | 132958155 | 3 |
| 3  | 151738746 | 151738785 | 3 |
| 3  | 161708398 | 161708480 | 3 |
| 3  | 189257757 | 189257833 | 3 |
| 4  | 2921883   | 2921961   | 3 |
| 4  | 52091040  | 52091227  | 3 |
| 4  | 129946708 | 129946748 | 3 |
| 4  | 138784371 | 138784406 | 3 |
| 5  | 55097912  | 55097941  | 3 |
| 5  | 72807787  | 72807867  | 3 |
| 5  | 130608117 | 130608199 | 3 |
| 6  | 64569326  | 64569404  | 3 |
| 6  | 129836807 | 129836836 | 3 |
| 7  | 42370174  | 42370204  | 3 |
| 7  | 126278796 | 126278826 | 3 |
| 8  | 70464804  | 70464834  | 3 |
| 9  | 77266893  | 77266924  | 3 |
| 9  | 86089508  | 86089570  | 3 |
| 9  | 106203067 | 106203115 | 3 |
| 9  | 135842204 | 135842260 | 3 |
| X  | 25883671  | 25883751  | 3 |
| X  | 66859096  | 66859158  | 3 |
| X  | 72890882  | 72890961  | 3 |
| X  | 76266404  | 76266576  | 3 |
| X  | 77822728  | 77822791  | 3 |
| X  | 114184815 | 114184894 | 3 |

|    |           |           |   |
|----|-----------|-----------|---|
| X  | 123284616 | 123284662 | 3 |
| Y  | 17244190  | 17244225  | 3 |
| 1  | 100201264 | 100201315 | 2 |
| 1  | 113574938 | 113575015 | 2 |
| 1  | 221048769 | 221048848 | 2 |
| 10 | 27588649  | 27588725  | 2 |
| 10 | 74607983  | 74608053  | 2 |
| 10 | 85279118  | 85279180  | 2 |
| 11 | 10964600  | 10964629  | 2 |
| 11 | 13991414  | 13991525  | 2 |
| 11 | 23485409  | 23485442  | 2 |
| 12 | 298882    | 298961    | 2 |
| 12 | 77287529  | 77287608  | 2 |
| 12 | 100303003 | 100303060 | 2 |
| 14 | 37189162  | 37189192  | 2 |
| 14 | 37631864  | 37631943  | 2 |
| 14 | 38600553  | 38600628  | 2 |
| 14 | 60528004  | 60528034  | 2 |
| 15 | 97584199  | 97584253  | 2 |
| 2  | 55836250  | 55836302  | 2 |
| 2  | 108430772 | 108430852 | 2 |
| 2  | 135517023 | 135517103 | 2 |
| 2  | 185687111 | 185687141 | 2 |
| 2  | 209242803 | 209242841 | 2 |
| 2  | 210985966 | 210986002 | 2 |
| 2  | 215989728 | 215989806 | 2 |
| 3  | 1062530   | 1062583   | 2 |
| 3  | 37430107  | 37430137  | 2 |
| 3  | 37659431  | 37659483  | 2 |
| 3  | 66293038  | 66293091  | 2 |
| 3  | 83107843  | 83107878  | 2 |
| 3  | 118321439 | 118321542 | 2 |
| 3  | 137318338 | 137318505 | 2 |
| 3  | 181003254 | 181003292 | 2 |
| 4  | 141164135 | 141164215 | 2 |
| 4  | 151596775 | 151596822 | 2 |

|   |           |           |   |
|---|-----------|-----------|---|
| 5 | 10179015  | 10179090  | 2 |
| 5 | 23187510  | 23187541  | 2 |
| 5 | 58607294  | 58607324  | 2 |
| 5 | 62036387  | 62036469  | 2 |
| 5 | 63091672  | 63091711  | 2 |
| 5 | 89801765  | 89801794  | 2 |
| 5 | 131897639 | 131897669 | 2 |
| 5 | 157425693 | 157425722 | 2 |
| 6 | 44880299  | 44880339  | 2 |
| 6 | 74034428  | 74034458  | 2 |
| 6 | 80684596  | 80684626  | 2 |
| 6 | 85203246  | 85203406  | 2 |
| 6 | 103523273 | 103523307 | 2 |
| 6 | 118839175 | 118839250 | 2 |
| 6 | 145674670 | 145674700 | 2 |
| 7 | 82491495  | 82491547  | 2 |
| 7 | 83628538  | 83628668  | 2 |
| 7 | 90550302  | 90550332  | 2 |
| 7 | 103404937 | 103405067 | 2 |
| 8 | 24163281  | 24163355  | 2 |
| 8 | 50991236  | 50991272  | 2 |
| 8 | 126458501 | 126458603 | 2 |
| 9 | 4468020   | 4468049   | 2 |
| 9 | 13793024  | 13793059  | 2 |
| X | 22233561  | 22233601  | 2 |
| X | 37529185  | 37529262  | 2 |
| X | 39279450  | 39279485  | 2 |
| X | 65065894  | 65065929  | 2 |
| X | 68777046  | 68777075  | 2 |
| X | 72829874  | 72829954  | 2 |
| X | 73893754  | 73893927  | 2 |
| X | 78231808  | 78231854  | 2 |
| X | 132450416 | 132450455 | 2 |
| Y | 19797122  | 19797152  | 2 |
| Y | 25135576  | 25135605  | 2 |
| 1 | 49653699  | 49653732  | 1 |

|    |           |           |   |
|----|-----------|-----------|---|
| 1  | 95798603  | 95798636  | 1 |
| 1  | 104058227 | 104058328 | 1 |
| 1  | 121585910 | 121585971 | 1 |
| 1  | 183683918 | 183683974 | 1 |
| 1  | 217381027 | 217381057 | 1 |
| 10 | 25620855  | 25620916  | 1 |
| 10 | 32501130  | 32501208  | 1 |
| 10 | 38188104  | 38188231  | 1 |
| 10 | 43835326  | 43835400  | 1 |
| 10 | 95933132  | 95933212  | 1 |
| 11 | 2497417   | 2497464   | 1 |
| 11 | 10340974  | 10341023  | 1 |
| 11 | 10951117  | 10951204  | 1 |
| 11 | 18993428  | 18993458  | 1 |
| 11 | 21696140  | 21696178  | 1 |
| 11 | 35023350  | 35023379  | 1 |
| 11 | 40849880  | 40849915  | 1 |
| 11 | 60010348  | 60010383  | 1 |
| 11 | 102818644 | 102818711 | 1 |
| 11 | 103911692 | 103911792 | 1 |
| 11 | 106757099 | 106757146 | 1 |
| 12 | 67554440  | 67554498  | 1 |
| 12 | 83682922  | 83682956  | 1 |
| 12 | 87419901  | 87419977  | 1 |
| 12 | 88668816  | 88668865  | 1 |
| 13 | 28692799  | 28692837  | 1 |
| 13 | 48138356  | 48138391  | 1 |
| 13 | 48417665  | 48417789  | 1 |
| 13 | 48674351  | 48674392  | 1 |
| 13 | 65108638  | 65108684  | 1 |
| 13 | 82954030  | 82954059  | 1 |
| 13 | 110078372 | 110078512 | 1 |
| 13 | 112815740 | 112815792 | 1 |
| 14 | 23943808  | 23943842  | 1 |
| 14 | 52595569  | 52595599  | 1 |
| 14 | 57099859  | 57100019  | 1 |



|    |           |           |   |
|----|-----------|-----------|---|
| 14 | 86047199  | 86047299  | 1 |
| 15 | 38802218  | 38802296  | 1 |
| 16 | 47773943  | 47773979  | 1 |
| 17 | 60765937  | 60765967  | 1 |
| 18 | 7867947   | 7868076   | 1 |
| 18 | 70922054  | 70922084  | 1 |
| 18 | 79082158  | 79082309  | 1 |
| 19 | 20989556  | 20989595  | 1 |
| 19 | 34566964  | 34567007  | 1 |
| 2  | 24536202  | 24536232  | 1 |
| 2  | 37940636  | 37940717  | 1 |
| 2  | 114303065 | 114303136 | 1 |
| 2  | 115893829 | 115893883 | 1 |
| 2  | 115964762 | 115964810 | 1 |
| 2  | 138797304 | 138797352 | 1 |
| 2  | 157705827 | 157705877 | 1 |
| 2  | 160627322 | 160627351 | 1 |
| 2  | 175710458 | 175710523 | 1 |
| 2  | 179630901 | 179630930 | 1 |
| 2  | 181749287 | 181749327 | 1 |
| 2  | 195952731 | 195952831 | 1 |
| 2  | 197749565 | 197749643 | 1 |
| 2  | 198686171 | 198686206 | 1 |
| 20 | 5240493   | 5240528   | 1 |
| 20 | 7319855   | 7319984   | 1 |
| 20 | 13053739  | 13053800  | 1 |
| 20 | 17412412  | 17412441  | 1 |
| 21 | 32220857  | 32220891  | 1 |
| 3  | 1654266   | 1654320   | 1 |
| 3  | 4244989   | 4245018   | 1 |
| 3  | 19681438  | 19681508  | 1 |
| 3  | 25932828  | 25932925  | 1 |
| 3  | 26322798  | 26322827  | 1 |
| 3  | 58677350  | 58677405  | 1 |
| 3  | 61262568  | 61262723  | 1 |
| 3  | 79049279  | 79049308  | 1 |

|   |           |           |   |
|---|-----------|-----------|---|
| 3 | 101923796 | 101923853 | 1 |
| 3 | 110496407 | 110496461 | 1 |
| 3 | 119131435 | 119131463 | 1 |
| 3 | 131043495 | 131043524 | 1 |
| 3 | 132607456 | 132607536 | 1 |
| 3 | 162248018 | 162248047 | 1 |
| 3 | 173383511 | 173383568 | 1 |
| 4 | 36438850  | 36438880  | 1 |
| 4 | 52152806  | 52152868  | 1 |
| 4 | 54826081  | 54826116  | 1 |
| 4 | 62570692  | 62570725  | 1 |
| 4 | 63590979  | 63591014  | 1 |
| 4 | 88540328  | 88540357  | 1 |
| 4 | 89089117  | 89089159  | 1 |
| 4 | 93931541  | 93931585  | 1 |
| 4 | 105298432 | 105298463 | 1 |
| 4 | 105410291 | 105410324 | 1 |
| 4 | 106470321 | 106470368 | 1 |
| 4 | 127462897 | 127462977 | 1 |
| 4 | 134441891 | 134441921 | 1 |
| 4 | 149340304 | 149340484 | 1 |
| 4 | 158901718 | 158901771 | 1 |
| 4 | 161116977 | 161117008 | 1 |
| 4 | 180469748 | 180469818 | 1 |
| 4 | 188673825 | 188673905 | 1 |
| 5 | 11671624  | 11671722  | 1 |
| 5 | 12154880  | 12154930  | 1 |
| 5 | 12673020  | 12673064  | 1 |
| 5 | 34446538  | 34446577  | 1 |
| 5 | 36466573  | 36466648  | 1 |
| 5 | 43964701  | 43964750  | 1 |
| 5 | 64475460  | 64475491  | 1 |
| 5 | 111715962 | 111716031 | 1 |
| 5 | 156784195 | 156784224 | 1 |
| 5 | 171021523 | 171021680 | 1 |
| 6 | 4406975   | 4407041   | 1 |

|   |           |           |   |
|---|-----------|-----------|---|
| 6 | 6071466   | 6071497   | 1 |
| 6 | 6669546   | 6669575   | 1 |
| 6 | 23259034  | 23259078  | 1 |
| 6 | 29361162  | 29361192  | 1 |
| 6 | 54328854  | 54328905  | 1 |
| 6 | 56205318  | 56205396  | 1 |
| 6 | 57289186  | 57289215  | 1 |
| 6 | 61184838  | 61184882  | 1 |
| 6 | 62087944  | 62087999  | 1 |
| 6 | 64897837  | 64897887  | 1 |
| 6 | 76098911  | 76098978  | 1 |
| 6 | 80241002  | 80241031  | 1 |
| 6 | 80432412  | 80432451  | 1 |
| 6 | 84822318  | 84822357  | 1 |
| 6 | 85877646  | 85877676  | 1 |
| 6 | 85891427  | 85891480  | 1 |
| 6 | 93835946  | 93836020  | 1 |
| 6 | 115479811 | 115479840 | 1 |
| 6 | 117646938 | 117646991 | 1 |
| 6 | 118422412 | 118422441 | 1 |
| 6 | 120815032 | 120815057 | 1 |
| 6 | 127412009 | 127412038 | 1 |
| 6 | 130172958 | 130173105 | 1 |
| 6 | 143034121 | 143034146 | 1 |
| 6 | 143856165 | 143856214 | 1 |
| 6 | 144507015 | 144507087 | 1 |
| 6 | 147252460 | 147252491 | 1 |
| 6 | 161177395 | 161177424 | 1 |
| 7 | 9168104   | 9168133   | 1 |
| 7 | 24353484  | 24353539  | 1 |
| 7 | 31928150  | 31928200  | 1 |
| 7 | 40933685  | 40933715  | 1 |
| 7 | 76993700  | 76993783  | 1 |
| 7 | 81479819  | 81479849  | 1 |
| 7 | 111704966 | 111705023 | 1 |
| 7 | 123855950 | 123856021 | 1 |

|   |           |           |   |
|---|-----------|-----------|---|
| 8 | 9817216   | 9817350   | 1 |
| 8 | 59382190  | 59382229  | 1 |
| 8 | 60449422  | 60449474  | 1 |
| 8 | 62977446  | 62977510  | 1 |
| 8 | 94126185  | 94126228  | 1 |
| 8 | 112875671 | 112875814 | 1 |
| 9 | 1394768   | 1394814   | 1 |
| 9 | 19766048  | 19766097  | 1 |
| 9 | 21650599  | 21650633  | 1 |
| 9 | 27784005  | 27784102  | 1 |
| 9 | 75326431  | 75326480  | 1 |
| 9 | 100618372 | 100618401 | 1 |
| 9 | 114871042 | 114871112 | 1 |
| X | 3983375   | 3983414   | 1 |
| X | 6974962   | 6975007   | 1 |
| X | 8936147   | 8936182   | 1 |
| X | 17573430  | 17573465  | 1 |
| X | 55094658  | 55094689  | 1 |
| X | 55605269  | 55605348  | 1 |
| X | 55673094  | 55673123  | 1 |
| X | 56675050  | 56675084  | 1 |
| X | 56810500  | 56810557  | 1 |
| X | 57480993  | 57481029  | 1 |
| X | 64476702  | 64476737  | 1 |
| X | 64660959  | 64660990  | 1 |
| X | 78373062  | 78373133  | 1 |
| X | 81065026  | 81065055  | 1 |
| X | 96428324  | 96428357  | 1 |
| X | 108943152 | 108943212 | 1 |
| X | 110658261 | 110658296 | 1 |
| X | 110972904 | 110972974 | 1 |
| X | 113734752 | 113734813 | 1 |
| X | 115984351 | 115984421 | 1 |
| X | 122062343 | 122062461 | 1 |
| X | 148180774 | 148180871 | 1 |
| X | 155320936 | 155320974 | 1 |

|   |          |          |   |
|---|----------|----------|---|
| Y | 3594102  | 3594143  | 1 |
| Y | 15618152 | 15618191 | 1 |
| Y | 15853088 | 15853128 | 1 |
| Y | 20675850 | 20675879 | 1 |
| Y | 22498980 | 22499009 | 1 |

**Table S5: Location of targeted *attH4X* sequences in corresponding *LINE-1* in hESC clones identified using different primer pairs**

| Clone #                                     | Genomic coordinates       | Genomic locations       | <i>LINE-1</i> elements |
|---------------------------------------------|---------------------------|-------------------------|------------------------|
| <b>Primers: cs_attH4X_R1 + Puro Fwd 509</b> |                           |                         |                        |
| 2                                           | chr1:183683917-183684005  | intron of RGL1 gene     | L1PA7                  |
| 4                                           | chr8:99415140-99415208    | intron of VPS13B gene   | L1PA7                  |
| 5                                           | chr12:101061623-101061687 | intron of ANO4 gene     | L1PA7                  |
| 7                                           | chr2:6903549-6903642      | Intergenic              | L1PA7                  |
| 8                                           | chr7:54854750-54854843    | Intergenic              | L1PA7                  |
| 10                                          | chr7:54854750-54854857    | Intergenic              | L1PA7                  |
| 12                                          | chr6:23431494-23431600    | Intergenic              | L1PA8                  |
| 13                                          | chr2:6903549-6903622      | Intergenic              | L1PA7                  |
| 17                                          | chr2:58169734-58169833    | intron of FANCL gene    | L1P2                   |
| 19                                          | chrX:44254483-44254552    | intron of EFHC2 gene    | L1PA7                  |
| 27                                          | chr20:13053749-13053819   | intron of SPTLC3        | L1P3                   |
| 31                                          | chr7:54854750-54854843    | Intergenic              | L1PA7                  |
| <b>Primers: cs_attH4X_R2 + Puro Fwd 509</b> |                           |                         |                        |
| 1                                           | chr12:72781550-72781631   | Intergenic              | L1P3                   |
| 2                                           | chr12:101061615-101061782 | intron of ANO4 gene     | L1PA7                  |
| 3                                           | chr12:101061615-101061765 | intron of ANO4 gene     | L1PA7                  |
| 4                                           | chr10:31567534-31567630   | Intergenic              | L1PA7                  |
| 5                                           | chr12:101061615-101061782 | intron of ANO4 gene     | L1PA7                  |
| 7                                           | chr3:157803256-157803426  | Intergenic              | L1PA7                  |
| 8                                           | chr11:96488217-96488387   | Intron of JRKL-AS1 gene | L1PA6                  |
| 9                                           | chr12:101061615-101061782 | intron of ANO4 gene     | L1PA7                  |
| 10                                          | chr12:101061615-101061782 | intron of ANO4 gene     | L1PA7                  |
| 11                                          | chr3:157803256-157803426  | Intergenic              | L1PA7                  |
| 12                                          | chr3:157803256-157803426  | Intergenic              | L1PA7                  |
| 13                                          | chr2:73509950-73510120    | Intron of ALMS1 gene    | L1PA7                  |
| 14                                          | chr17:35302478-35302584   | intergenic              | L1PA7                  |
| 15                                          | chr3:157803256-157803426  | Intergenic              | L1PA7                  |
| 16                                          | chr3:157803256-157803426  | Intergenic              | L1PA7                  |
| 19                                          | chr7:54854750-54854920    | Intergenic              | L1PA7                  |
| 20                                          | chr3:157803256-157803426  | Intergenic              | L1PA7                  |
| 27                                          | chr3:157803256-157803413  | Intergenic              | L1PA7                  |

|                                        |                           |                      |       |
|----------------------------------------|---------------------------|----------------------|-------|
| 29                                     | chr12:101061615-101061782 | intron of ANO4 gene  | L1PA7 |
| 30                                     | chr3:157803256-157803426  | Intergenic           | L1PA7 |
| 32                                     | chr12:44898931-44899037   | intron of NELL2      | L1PA7 |
| <b>Primers: cs_attH4X_F1 + PGK Rev</b> |                           |                      |       |
| 3                                      | chr3:156067764-156067893  | Intergenic           | L1PA7 |
| <b>Primers: cs_attH4X_F2 + PGK Rev</b> |                           |                      |       |
| 7                                      | chr2:159357384-159357465  | Intron of BAZ2B gene | L1PA7 |
| 15                                     | chr2:159357384-159357515  | Intron of BAZ2B gene | L1PA7 |
| 17                                     | chr2:159357384-159357490  | Intron of BAZ2B gene | L1PA7 |
| 29                                     | chr2:159357384-159357485  | Intron of BAZ2B gene | L1PA7 |
| 32                                     | chr2:159357384-159357505  | Intron of BAZ2B gene | L1PA7 |

**Table S6: Location of *attH4X* sequences in corresponding *LINE-1* in hESC clones targeted with anti-CD19-CAR seamless vector identified using different primer pairs**

| Clone #                                 | Genomic coordinates      | Genomic locations    | <i>LINE-1</i> elements |
|-----------------------------------------|--------------------------|----------------------|------------------------|
| <b>Primers: cs_attH4X_F1 + attP Rev</b> |                          |                      |                        |
| 1                                       | chr12:88438383-88438489  | Intergenic           | L1PA7                  |
| 2                                       | chr12:88438383-88438495  | Intergenic           | L1PA7                  |
| 3                                       | chr12:88438383-88438496  | Intergenic           | L1PA7                  |
| 23                                      | chr3:156067805-156067912 | Intergenic           | L1PA7                  |
| 34                                      | chr2:153327436-153327543 | Intergenic           | L1PA7                  |
| 36                                      | chr3:156067805-156067911 | Intergenic           | L1PA7                  |
| 39                                      | chr12:88438384-88438497  | Intergenic           | L1PA7                  |
| 46                                      | chr12:88438384-88438489  | Intergenic           | L1PA7                  |
| 47                                      | chr12:88438383-88438491  | Intergenic           | L1PA7                  |
| 48                                      | chr12:88438384-88438498  | Intergenic           | L1PA7                  |
| <b>Primers: cs_attH4X_F2 + attP Rev</b> |                          |                      |                        |
| 19                                      | chr2:159357384-159357546 | Intron of BAZ2B gene | L1PA7                  |
| 25                                      | chr2:159357384-159357549 | Intron of BAZ2B gene | L1PA7                  |



**Table S7: Genomic coordinates and annotations of 933 *attH4X*-containing *LINE-1***

| Serial # | Genomic coordinates       | Genomic annotations | <i>LINE-1</i> elements |
|----------|---------------------------|---------------------|------------------------|
| 1        | chr1:104052453-104058471  | Intergenic          | L1P3                   |
| 2        | chr1:106848665-106854683  | Intergenic          | L1PA7                  |
| 3        | chr1:108513472-108519490  | Intergenic          | L1PA8                  |
| 4        | chr1:115632200-115638218  | Intergenic          | L1PA7                  |
| 5        | chr1:157341002-157347020  | Intergenic          | L1PA7                  |
| 6        | chr1:157657044-157663062  | Intergenic          | L1P2                   |
| 7        | chr1:158425760-158431778  | Intergenic          | L1PA7                  |
| 8        | chr1:163985551-163991569  | Intergenic          | L1PA7                  |
| 9        | chr1:164190913-164196931  | Intergenic          | L1PA7                  |
| 10       | chr1:164495894-164501912  | Intergenic          | L1P3                   |
| 11       | chr1:166545171-166551189  | Intergenic          | L1PA7                  |
| 12       | chr1:170450774-170456792  | Intergenic          | L1PA7                  |
| 13       | chr1:171354951-171360969  | Intergenic          | L1PA7                  |
| 14       | chr1:179689756-179695774  | Intergenic          | L1PA7                  |
| 15       | chr1:181264613-181270631  | Intergenic          | L1PA7                  |
| 16       | chr1:181954606-181960624  | Intergenic          | L1PA7                  |
| 17       | chr1:186505142-186511160  | Intergenic          | L1PA7                  |
| 18       | chr1:194654292-194660310  | Intergenic          | L1PA7                  |
| 19       | chr1:199594876-199600894  | Intergenic          | L1MA4                  |
| 20       | chr1:199628259-199634277  | Intergenic          | L1PA7                  |
| 21       | chr1:213705241-213711259  | Intergenic          | L1PA7                  |
| 22       | chr1:218646503-218652521  | Intergenic          | L1PA7                  |
| 23       | chr1:221042849-221048867  | Intergenic          | L1PA7                  |
| 24       | chr1:227545122-227551140  | Intergenic          | L1PA4                  |
| 25       | chr1:48166046-48172064    | Intergenic          | L1PA7                  |
| 26       | chr1:51000638-51006656    | Intergenic          | L1P3                   |
| 27       | chr1:55425980-55431998    | Intergenic          | L1PA7                  |
| 28       | chr1:60322090-60328108    | Intergenic          | L1PA7                  |
| 29       | chr1:65704276-65710294    | Intergenic          | L1P3                   |
| 30       | chr1:65736931-65742949    | Intergenic          | L1PA7                  |
| 31       | chr1:74009780-74015798    | Intergenic          | L1P2                   |
| 32       | chr1:78198809-78204827    | Intergenic          | L1PA7                  |
| 33       | chr1:84438484-84444502    | Intergenic          | L1PA7                  |
| 34       | chr1:91181409-91187427    | Intergenic          | L1PA7                  |
| 35       | chr1:91421164-91427182    | Intergenic          | L1PA8                  |
| 36       | chr1:95792637-95798655    | Intergenic          | L1PA7                  |
| 37       | chr1:99154973-99160991    | Intergenic          | L1PA7                  |
| 38       | chr10:108943943-108949961 | Intergenic          | L1P4                   |
| 39       | chr10:126759772-126765790 | Intergenic          | L1PA7                  |

|    |                           |            |       |
|----|---------------------------|------------|-------|
| 40 | chr10:22506958-22512976   | Intergenic | LIPA7 |
| 41 | chr10:27582725-27588743   | Intergenic | LIPA7 |
| 42 | chr10:28745949-28751967   | Intergenic | LIPA7 |
| 43 | chr10:31561533-31567551   | Intergenic | LIPA7 |
| 44 | chr10:43829307-43835325   | Intergenic | LIP3  |
| 45 | chr10:44261990-44268008   | Intergenic | LIP2  |
| 46 | chr10:47432567-47438585   | Intergenic | LIPA6 |
| 47 | chr10:52367959-52373977   | Intergenic | LIP3  |
| 48 | chr10:59202838-59208856   | Intergenic | LIPA7 |
| 49 | chr10:59465749-59471767   | Intergenic | LIPA7 |
| 50 | chr10:62777722-62783740   | Intergenic | LIPA7 |
| 51 | chr10:64803176-64809194   | Intergenic | LIPA7 |
| 52 | chr10:67715389-67721407   | Intergenic | LIPA7 |
| 53 | chr10:84644377-84650395   | Intergenic | LIP2  |
| 54 | chr10:85273119-85279137   | Intergenic | LIPA7 |
| 55 | chr10:91639572-91645590   | Intergenic | LIPA7 |
| 56 | chr11:10418823-10424841   | Intergenic | LIPA7 |
| 57 | chr11:110843042-110849060 | Intergenic | LIP2  |
| 58 | chr11:121780555-121786573 | Intergenic | LIPA7 |
| 59 | chr11:129462454-129468472 | Intergenic | LIPA7 |
| 60 | chr11:130969817-130975835 | Intergenic | LIPA7 |
| 61 | chr11:133877991-133884009 | Intergenic | LIPA3 |
| 62 | chr11:16722992-16729010   | Intergenic | LIPA7 |
| 63 | chr11:21690179-21696197   | Intergenic | LIPA7 |
| 64 | chr11:27266631-27272649   | Intergenic | LIPA7 |
| 65 | chr11:3263141-3269159     | Intergenic | LIPA7 |
| 66 | chr11:3308961-3314979     | Intergenic | LIPA7 |
| 67 | chr11:34733207-34739225   | Intergenic | LIP3  |
| 68 | chr11:37203837-37209855   | Intergenic | LIPA7 |
| 69 | chr11:37351977-37357995   | Intergenic | LIPA7 |
| 70 | chr11:38724840-38730858   | Intergenic | LIPA7 |
| 71 | chr11:38914066-38920084   | Intergenic | LIPA7 |
| 72 | chr11:44432731-44438749   | Intergenic | LIPA7 |
| 73 | chr11:48446542-48452560   | Intergenic | LIPA7 |
| 74 | chr11:49958880-49964900   | Intergenic | LIP2  |
| 75 | chr11:54623473-54629491   | Intergenic | LIPA7 |
| 76 | chr11:55404942-55410960   | Intergenic | LIPA8 |
| 77 | chr11:56028523-56034541   | Intergenic | LIP3  |
| 78 | chr11:58276040-58282058   | Intergenic | LIPA7 |
| 79 | chr11:62299366-62305384   | Intergenic | LIP3  |
| 80 | chr11:63254561-63260579   | Intergenic | LIPA4 |

|     |                           |            |       |
|-----|---------------------------|------------|-------|
| 81  | chr11:87793914-87799932   | Intergenic | L1PA7 |
| 82  | chr12:102487128-102493146 | Intergenic | L1PA7 |
| 83  | chr12:105006218-105012236 | Intergenic | L1PA7 |
| 84  | chr12:112151938-112157956 | Intergenic | L1P3  |
| 85  | chr12:1935239-1941257     | Intergenic | L1P2  |
| 86  | chr12:20329340-20335358   | Intergenic | L1P3  |
| 87  | chr12:22361350-22367368   | Intergenic | L1PA7 |
| 88  | chr12:27164602-27170620   | Intergenic | L1PA7 |
| 89  | chr12:33487984-33494002   | Intergenic | L1PA7 |
| 90  | chr12:38041858-38047876   | Intergenic | L1P2  |
| 91  | chr12:39724884-39730902   | Intergenic | L1PA7 |
| 92  | chr12:46032266-46038284   | Intergenic | L1PA7 |
| 93  | chr12:54805683-54811701   | Intergenic | L1PA7 |
| 94  | chr12:55350643-55356661   | Intergenic | L1PA7 |
| 95  | chr12:58421277-58427295   | Intergenic | L1PA7 |
| 96  | chr12:60615156-60621174   | Intergenic | L1PA7 |
| 97  | chr12:72775613-72781631   | Intergenic | L1P3  |
| 98  | chr12:73666797-73672815   | Intergenic | L1P3  |
| 99  | chr12:7278968-7284986     | Intergenic | L1PA7 |
| 100 | chr12:74671806-74677824   | Intergenic | L1PA7 |
| 101 | chr12:7589610-7595628     | Intergenic | L1PA7 |
| 102 | chr12:80077000-80083018   | Intergenic | L1PA7 |
| 103 | chr12:80108847-80114865   | Intergenic | L1PA7 |
| 104 | chr12:84036488-84042506   | Intergenic | L1PA7 |
| 105 | chr12:88432382-88438400   | Intergenic | L1PA7 |
| 106 | chr12:88662866-88668884   | Intergenic | L1PA7 |
| 107 | chr12:90748214-90754232   | Intergenic | L1PA7 |
| 108 | chr12:91237967-91243985   | Intergenic | L1P3  |
| 109 | chr12:91552198-91558216   | Intergenic | L1P3  |
| 110 | chr12:91552198-91558216   | Intergenic | L1P3  |
| 111 | chr12:97891024-97897042   | Intergenic | L1PA7 |
| 112 | chr13:110072544-110078562 | Intergenic | L1PA7 |
| 113 | chr13:22309174-22315192   | Intergenic | L1P3  |
| 114 | chr13:22629807-22635825   | Intergenic | L1PA7 |
| 115 | chr13:26098935-26104953   | Intergenic | L1P3  |
| 116 | chr13:28686799-28692817   | Intergenic | L1PA7 |
| 117 | chr13:28776930-28782948   | Intergenic | L1PB1 |
| 118 | chr13:29629386-29635404   | Intergenic | L1PA7 |
| 119 | chr13:29660988-29667006   | Intergenic | L1PA3 |
| 120 | chr13:39233757-39239775   | Intergenic | L1P2  |
| 121 | chr13:40705599-40711617   | Intergenic | L1PA7 |

|     |                         |            |       |
|-----|-------------------------|------------|-------|
| 122 | chr13:45615097-45621115 | Intergenic | LIPA7 |
| 123 | chr13:45633908-45639926 | Intergenic | LIPA7 |
| 124 | chr13:49875124-49881142 | Intergenic | LIPA8 |
| 125 | chr13:56758549-56764567 | Intergenic | LIPA7 |
| 126 | chr13:59287109-59293127 | Intergenic | LIPA7 |
| 127 | chr13:59372539-59378557 | Intergenic | LIPA7 |
| 128 | chr13:60895742-60901760 | Intergenic | LIPA7 |
| 129 | chr13:62604224-62610242 | Intergenic | LIP3  |
| 130 | chr13:63775141-63781159 | Intergenic | LIPA7 |
| 131 | chr13:64823434-64829452 | Intergenic | LIPA7 |
| 132 | chr13:68788613-68794631 | Intergenic | LIPA7 |
| 133 | chr13:70452713-70458731 | Intergenic | LIPA7 |
| 134 | chr13:79953503-79959521 | Intergenic | LIPA7 |
| 135 | chr13:81357938-81363956 | Intergenic | LIPA7 |
| 136 | chr13:81625069-81631087 | Intergenic | LIPA7 |
| 137 | chr13:97588620-97594638 | Intergenic | LIP3  |
| 138 | chr14:19813418-19819436 | Intergenic | LIPA7 |
| 139 | chr14:25132135-25138153 | Intergenic | LIP3  |
| 140 | chr14:26304328-26310346 | Intergenic | LIPA7 |
| 141 | chr14:30403200-30409218 | Intergenic | LIPA7 |
| 142 | chr14:31489935-31495953 | Intergenic | LIP3  |
| 143 | chr14:38261674-38267692 | Intergenic | LIP3  |
| 144 | chr14:38594534-38600552 | Intergenic | LIPA7 |
| 145 | chr14:40083917-40089935 | Intergenic | LIPA7 |
| 146 | chr14:44688314-44694332 | Intergenic | LIPA7 |
| 147 | chr14:45749348-45755366 | Intergenic | LIPA7 |
| 148 | chr14:52377561-52383579 | Intergenic | LIP3  |
| 149 | chr14:56358306-56364324 | Intergenic | LIPA7 |
| 150 | chr14:57946699-57952717 | Intergenic | LIPA7 |
| 151 | chr14:81536068-81542086 | Intergenic | LIPA5 |
| 152 | chr14:84648254-84654272 | Intergenic | LIPA7 |
| 153 | chr14:89097549-89103567 | Intergenic | LIPA7 |
| 154 | chr14:94145413-94151431 | Intergenic | LIPA7 |
| 155 | chr15:24704224-24710242 | Intergenic | LIP2  |
| 156 | chr15:26526769-26532787 | Intergenic | LIPA7 |
| 157 | chr15:37312508-37318526 | Intergenic | LIP2  |
| 158 | chr15:38115141-38121159 | Intergenic | LIPA7 |
| 159 | chr15:38566322-38572340 | Intergenic | LIPA7 |
| 160 | chr15:53886605-53892623 | Intergenic | LIPA7 |
| 161 | chr15:54846448-54852466 | Intergenic | LIPA7 |
| 162 | chr15:55130616-55136634 | Intergenic | LIPA7 |

|     |                          |            |       |
|-----|--------------------------|------------|-------|
| 163 | chr15:57807861-57813879  | Intergenic | L1PA7 |
| 164 | chr15:58358316-58364334  | Intergenic | L1PA7 |
| 165 | chr15:76012058-76018076  | Intergenic | L1PA7 |
| 166 | chr16:25551557-25557575  | Intergenic | L1PA7 |
| 167 | chr16:47547266-47553284  | Intergenic | L1P3  |
| 168 | chr16:52968297-52974315  | Intergenic | L1P3  |
| 169 | chr16:54657077-54663095  | Intergenic | L1P3  |
| 170 | chr16:61086174-61092192  | Intergenic | L1PA7 |
| 171 | chr16:82302142-82308160  | Intergenic | L1PA7 |
| 172 | chr17:14593177-14599195  | Intergenic | L1PA8 |
| 173 | chr17:35296566-35302584  | Intergenic | L1PA7 |
| 174 | chr17:35326662-35332680  | Intergenic | L1PA7 |
| 175 | chr17:35519120-35525138  | Intergenic | L1PA7 |
| 176 | chr17:41211550-41217568  | Intergenic | L1P2  |
| 177 | chr17:51442400-51448418  | Intergenic | L1PA7 |
| 178 | chr17:52810140-52816158  | Intergenic | L1P2  |
| 179 | chr18:34422738-34428756  | Intergenic | L1PA7 |
| 180 | chr18:38912986-38919004  | Intergenic | L1PA7 |
| 181 | chr18:70232130-70238148  | Intergenic | L1P3  |
| 182 | chr18:71090855-71096873  | Intergenic | L1PA3 |
| 183 | chr19:34560945-34566963  | Intergenic | L1PA7 |
| 184 | chr19:34692017-34698035  | Intergenic | L1P3  |
| 185 | chr2:108424852-108430870 | Intergenic | L1PA7 |
| 186 | chr2:118450020-118456038 | Intergenic | L1PA7 |
| 187 | chr2:123387090-123393108 | Intergenic | L1P3  |
| 188 | chr2:129564250-129570268 | Intergenic | L1PA7 |
| 189 | chr2:138064064-138070082 | Intergenic | L1P2  |
| 190 | chr2:139643543-139649561 | Intergenic | L1PA8 |
| 191 | chr2:147579189-147585207 | Intergenic | L1PA7 |
| 192 | chr2:149972929-149978947 | Intergenic | L1PA7 |
| 193 | chr2:152891290-152897308 | Intergenic | L1PA7 |
| 194 | chr2:155344242-155350260 | Intergenic | L1PA8 |
| 195 | chr2:157699877-157705895 | Intergenic | L1PA7 |
| 196 | chr2:163493077-163499095 | Intergenic | L1P3  |
| 197 | chr2:175663727-175669745 | Intergenic | L1PA7 |
| 198 | chr2:175704524-175710542 | Intergenic | L1PA7 |
| 199 | chr2:175907032-175913050 | Intergenic | L1P3  |
| 200 | chr2:179071320-179077338 | Intergenic | L1PA7 |
| 201 | chr2:18160919-18166937   | Intergenic | L1PA7 |
| 202 | chr2:183837288-183843306 | Intergenic | L1PA7 |
| 203 | chr2:18456947-18462965   | Intergenic | L1PA7 |

|     |                          |            |       |
|-----|--------------------------|------------|-------|
| 204 | chr2:189885965-189891983 | Intergenic | L1PA7 |
| 205 | chr2:209236842-209242860 | Intergenic | L1PA7 |
| 206 | chr2:223286343-223292361 | Intergenic | L1PA7 |
| 207 | chr2:230599050-230605068 | Intergenic | L1PA7 |
| 208 | chr2:2444422-2450440     | Intergenic | L1P3  |
| 209 | chr2:39806409-39812427   | Intergenic | L1PA7 |
| 210 | chr2:48295684-48301702   | Intergenic | L1PA8 |
| 211 | chr2:49877586-49883604   | Intergenic | L1PA7 |
| 212 | chr2:60200071-60206089   | Intergenic | L1PA7 |
| 213 | chr2:68396467-68402485   | Intergenic | L1PA7 |
| 214 | chr2:6897548-6903566     | Intergenic | L1PA7 |
| 215 | chr2:75829386-75835404   | Intergenic | L1PA7 |
| 216 | chr2:76132439-76138457   | Intergenic | L1PA7 |
| 217 | chr2:81201399-81207417   | Intergenic | L1PA7 |
| 218 | chr2:82943306-82949324   | Intergenic | L1PA7 |
| 219 | chr20:18934583-18940601  | Intergenic | L1PA7 |
| 220 | chr20:24938193-24944211  | Intergenic | L1PA7 |
| 221 | chr20:25161344-25167362  | Intergenic | L1PA7 |
| 222 | chr20:5234474-5240492    | Intergenic | L1PA7 |
| 223 | chr20:55493312-55499330  | Intergenic | L1P2  |
| 224 | chr20:7314070-7320088    | Intergenic | L1P2  |
| 225 | chr20:7805888-7811906    | Intergenic | L1PA7 |
| 226 | chr21:14322562-14328580  | Intergenic | L1P3  |
| 227 | chr21:19419570-19425588  | Intergenic | L1PA7 |
| 228 | chr21:20917509-20923527  | Intergenic | L1P3  |
| 229 | chr21:25428868-25434886  | Intergenic | L1PA7 |
| 230 | chr21:46625654-46631672  | Intergenic | L1PA7 |
| 231 | chr22:35023674-35029691  | Intergenic | L1PA7 |
| 232 | chr3:101917776-101923794 | Intergenic | L1PA7 |
| 233 | chr3:105303026-105309044 | Intergenic | L1PA7 |
| 234 | chr3:1027861-1033879     | Intergenic | L1PA8 |
| 235 | chr3:110490441-110496459 | Intergenic | L1P3  |
| 236 | chr3:111439836-111445854 | Intergenic | L1PA7 |
| 237 | chr3:115172341-115178359 | Intergenic | L1PA7 |
| 238 | chr3:115746287-115752305 | Intergenic | L1PA7 |
| 239 | chr3:125991964-125997982 | Intergenic | L1P2  |
| 240 | chr3:132952135-132958153 | Intergenic | L1PA7 |
| 241 | chr3:133729717-133735735 | Intergenic | L1PA7 |
| 242 | chr3:137312319-137318337 | Intergenic | L1PA7 |
| 243 | chr3:137370028-137376046 | Intergenic | L1PA7 |
| 244 | chr3:140928770-140934788 | Intergenic | L1PA7 |

|     |                          |            |       |
|-----|--------------------------|------------|-------|
| 245 | chr3:156061894-156067912 | Intergenic | L1PA7 |
| 246 | chr3:157797255-157803273 | Intergenic | L1PA7 |
| 247 | chr3:164156148-164162166 | Intergenic | L1PA7 |
| 248 | chr3:16726080-16732098   | Intergenic | L1PA8 |
| 249 | chr3:1647309-1653327     | Intergenic | L1PA7 |
| 250 | chr3:170968031-170974049 | Intergenic | L1PA7 |
| 251 | chr3:182149435-182155453 | Intergenic | L1PA7 |
| 252 | chr3:19840109-19846127   | Intergenic | L1PA7 |
| 253 | chr3:22821731-22827749   | Intergenic | L1PA7 |
| 254 | chr3:25355211-25361229   | Intergenic | L1PA7 |
| 255 | chr3:26316799-26322817   | Intergenic | L1PA7 |
| 256 | chr3:26526732-26532750   | Intergenic | L1PA4 |
| 257 | chr3:39299941-39305959   | Intergenic | L1P3  |
| 258 | chr3:39736699-39742717   | Intergenic | L1PA7 |
| 259 | chr3:43933170-43939188   | Intergenic | L1PA7 |
| 260 | chr3:5370056-5383039     | Intergenic | L1PA7 |
| 261 | chr3:5377021-5383039     | Intergenic | L1PA7 |
| 262 | chr3:5407931-5413949     | Intergenic | L1PA7 |
| 263 | chr3:66764240-66770258   | Intergenic | L1P3  |
| 264 | chr3:77752163-77758181   | Intergenic | L1PA7 |
| 265 | chr3:77838107-77844125   | Intergenic | L1PA7 |
| 266 | chr3:7899074-7905092     | Intergenic | L1P3  |
| 267 | chr3:83631126-83637144   | Intergenic | L1PA6 |
| 268 | chr3:86869892-86875910   | Intergenic | L1PA7 |
| 269 | chr3:96086586-96092604   | Intergenic | L1PA7 |
| 270 | chr4:100260503-100266521 | Intergenic | L1PA7 |
| 271 | chr4:10420841-10426859   | Intergenic | L1P3  |
| 272 | chr4:103480167-103486185 | Intergenic | L1PA7 |
| 273 | chr4:106464301-106470319 | Intergenic | L1PA7 |
| 274 | chr4:11040984-11047002   | Intergenic | L1P2  |
| 275 | chr4:110424902-110430920 | Intergenic | L1PA7 |
| 276 | chr4:114005875-114011893 | Intergenic | L1PA7 |
| 277 | chr4:120504519-120510537 | Intergenic | L1PA7 |
| 278 | chr4:12153870-12159888   | Intergenic | L1PA7 |
| 279 | chr4:121435790-121441808 | Intergenic | L1P2  |
| 280 | chr4:122439033-122445051 | Intergenic | L1PA7 |
| 281 | chr4:129119256-129125274 | Intergenic | L1PA8 |
| 282 | chr4:129285665-129291683 | Intergenic | L1PA7 |
| 283 | chr4:133563047-133569065 | Intergenic | L1P3  |
| 284 | chr4:141985745-141991763 | Intergenic | L1PA7 |
| 285 | chr4:142863125-142869143 | Intergenic | L1PA7 |

|     |                          |            |        |
|-----|--------------------------|------------|--------|
| 286 | chr4:147179280-147185298 | Intergenic | LIPA7  |
| 287 | chr4:153852459-153858477 | Intergenic | LIP3   |
| 288 | chr4:154104193-154110211 | Intergenic | LIPA3  |
| 289 | chr4:159622457-159628475 | Intergenic | LIPA7  |
| 290 | chr4:159997071-160003089 | Intergenic | LIPA7  |
| 291 | chr4:160335208-160341226 | Intergenic | LIPA7  |
| 292 | chr4:162997448-163003466 | Intergenic | LIP3   |
| 293 | chr4:171754456-171760474 | Intergenic | LIP2   |
| 294 | chr4:173077558-173083576 | Intergenic | LIPA7  |
| 295 | chr4:173720675-173726693 | Intergenic | LIPA7  |
| 296 | chr4:174613541-174619559 | Intergenic | LIP2   |
| 297 | chr4:178632397-178638415 | Intergenic | LIP3   |
| 298 | chr4:180463798-180469816 | Intergenic | LIPA7  |
| 299 | chr4:18554843-18560861   | Intergenic | LIPA8  |
| 300 | chr4:22352963-22358981   | Intergenic | LIPA16 |
| 301 | chr4:29588410-29594428   | Intergenic | LIP3   |
| 302 | chr4:36931032-36937050   | Intergenic | LIPA7  |
| 303 | chr4:39667756-39673774   | Intergenic | LIPA7  |
| 304 | chr4:42037482-42043500   | Intergenic | LIPA7  |
| 305 | chr4:44469127-44475145   | Intergenic | LIPA7  |
| 306 | chr4:48275330-48281348   | Intergenic | LIPA7  |
| 307 | chr4:52202626-52208644   | Intergenic | LIPA7  |
| 308 | chr4:54820116-54826134   | Intergenic | LIPA7  |
| 309 | chr4:60149131-60155149   | Intergenic | LIPA7  |
| 310 | chr4:66977153-66983171   | Intergenic | LIP3   |
| 311 | chr4:67405449-67411467   | Intergenic | LIPA7  |
| 312 | chr4:72841622-72847640   | Intergenic | LIP3   |
| 313 | chr4:75264011-75270029   | Intergenic | LIPA7  |
| 314 | chr4:82147360-82153378   | Intergenic | LIPA8  |
| 315 | chr4:82267162-82273180   | Intergenic | LIPA7  |
| 316 | chr4:84540366-84546384   | Intergenic | LIP3   |
| 317 | chr4:87936881-87942899   | Intergenic | LIP2   |
| 318 | chr4:89083097-89089115   | Intergenic | LIPA7  |
| 319 | chr4:92074400-92080418   | Intergenic | LIPA7  |
| 320 | chr4:96858278-96864296   | Intergenic | LIPA7  |
| 321 | chr5:102172348-102178366 | Intergenic | LIP3   |
| 322 | chr5:10173070-10179088   | Intergenic | LIPA7  |
| 323 | chr5:103378923-103384941 | Intergenic | LIPA7  |
| 324 | chr5:110885785-110891803 | Intergenic | LIPA7  |
| 325 | chr5:112431343-112437361 | Intergenic | LIPA8  |
| 326 | chr5:112498994-112505012 | Intergenic | LIPA8  |



|     |                          |            |        |
|-----|--------------------------|------------|--------|
| 327 | chr5:112534368-112540386 | Intergenic | LIPA7  |
| 328 | chr5:116075591-116081609 | Intergenic | LIP3   |
| 329 | chr5:118721839-118727857 | Intergenic | LIME4a |
| 330 | chr5:12148910-12154928   | Intergenic | LIPA7  |
| 331 | chr5:12667000-12673018   | Intergenic | LIP3   |
| 332 | chr5:129146206-129152224 | Intergenic | LIPA7  |
| 333 | chr5:136846484-136852502 | Intergenic | LIPA7  |
| 334 | chr5:136926712-136932730 | Intergenic | LIPA7  |
| 335 | chr5:136946782-136952800 | Intergenic | LIPA7  |
| 336 | chr5:137778350-137784368 | Intergenic | LIPA6  |
| 337 | chr5:145507399-145513417 | Intergenic | LIPA7  |
| 338 | chr5:160888465-160894483 | Intergenic | LIPA7  |
| 339 | chr5:32891608-32897626   | Intergenic | LIPA7  |
| 340 | chr5:34381927-34387945   | Intergenic | LIP3   |
| 341 | chr5:34440539-34446557   | Intergenic | LIPA7  |
| 342 | chr5:40123782-40129800   | Intergenic | LIPA7  |
| 343 | chr5:40629869-40635887   | Intergenic | LIPA7  |
| 344 | chr5:44101263-44107281   | Intergenic | LIPA7  |
| 345 | chr5:63354098-63360116   | Intergenic | LIPA7  |
| 346 | chr5:63371230-63377248   | Intergenic | LIPA7  |
| 347 | chr5:64469469-64475487   | Intergenic | LIP3   |
| 348 | chr5:73202485-73208503   | Intergenic | LIPA7  |
| 349 | chr5:75243536-75249554   | Intergenic | LIPA7  |
| 350 | chr5:8215426-8221444     | Intergenic | LIPA7  |
| 351 | chr5:85580957-85586975   | Intergenic | LIPA7  |
| 352 | chr5:90026926-90032944   | Intergenic | LIPA7  |
| 353 | chr5:97698804-97704822   | Intergenic | LIPA6  |
| 354 | chr5:9932172-9938190     | Intergenic | LIP1   |
| 355 | chr6:112416775-112422793 | Intergenic | LIPA7  |
| 356 | chr6:115159391-115165409 | Intergenic | LIPA7  |
| 357 | chr6:115640575-115646593 | Intergenic | LIP3   |
| 358 | chr6:115847723-115853741 | Intergenic | LIPA7  |
| 359 | chr6:117170289-117176307 | Intergenic | LIPA7  |
| 360 | chr6:117741007-117747025 | Intergenic | LIPA7  |
| 361 | chr6:117803730-117809748 | Intergenic | LIPA8  |
| 362 | chr6:11832609-11838627   | Intergenic | LIPA7  |
| 363 | chr6:119413373-119419391 | Intergenic | LIP7   |
| 364 | chr6:121755908-121761926 | Intergenic | LIP3   |
| 365 | chr6:126553863-126559881 | Intergenic | LIPA7  |
| 366 | chr6:126607783-126613801 | Intergenic | LIPA7  |
| 367 | chr6:127223904-127229922 | Intergenic | LIPA7  |

|     |                          |            |        |
|-----|--------------------------|------------|--------|
| 368 | chr6:129564382-129570400 | Intergenic | LIPA7  |
| 369 | chr6:131533976-131539994 | Intergenic | LIPA7  |
| 370 | chr6:133147794-133153812 | Intergenic | LIP3   |
| 371 | chr6:135149068-135155086 | Intergenic | LIPA7  |
| 372 | chr6:137065546-137071564 | Intergenic | LIPA7  |
| 373 | chr6:140225511-140231529 | Intergenic | LIPA7  |
| 374 | chr6:145173359-145179377 | Intergenic | LIPA8  |
| 375 | chr6:155744006-155750024 | Intergenic | LIP3   |
| 376 | chr6:159283284-159289302 | Intergenic | LIPA7  |
| 377 | chr6:160523252-160529270 | Intergenic | LIPA7  |
| 378 | chr6:17068849-17074867   | Intergenic | LIPA7  |
| 379 | chr6:23425493-23431511   | Intergenic | LIPA8  |
| 380 | chr6:29184748-29190766   | Intergenic | LIPA7  |
| 381 | chr6:60656678-60662696   | Intergenic | LIP2   |
| 382 | chr6:5910586-5916604     | Intergenic | LIPA7  |
| 383 | chr6:62487433-62493451   | Intergenic | LIPA7  |
| 384 | chr6:66484460-66490478   | Intergenic | LIPA7  |
| 385 | chr6:68201035-68207053   | Intergenic | LIP3   |
| 386 | chr6:70329356-70335374   | Intergenic | LIPA7  |
| 387 | chr6:70993406-70999424   | Intergenic | LIP3   |
| 388 | chr6:76092958-76098976   | Intergenic | LIPA7  |
| 389 | chr6:77513837-77519855   | Intergenic | LIPA7  |
| 390 | chr6:78000948-78006966   | Intergenic | LIPA10 |
| 391 | chr6:78800366-78806384   | Intergenic | LIPA7  |
| 392 | chr6:80426413-80432431   | Intergenic | LIPA7  |
| 393 | chr6:82802225-82808241   | Intergenic | LIPA7  |
| 394 | chr6:85205877-85211895   | Intergenic | LIPA7  |
| 395 | chr6:85846609-85852627   | Intergenic | LIPA4  |
| 396 | chr6:90732480-90738498   | Intergenic | LIPA7  |
| 397 | chr7:106297213-106303231 | Intergenic | LIP3   |
| 398 | chr7:106353928-106359946 | Intergenic | LIPA7  |
| 399 | chr7:109078633-109084651 | Intergenic | LIP2   |
| 400 | chr7:110349510-110355528 | Intergenic | LIPA7  |
| 401 | chr7:111698947-111704965 | Intergenic | LIPA7  |
| 402 | chr7:127421490-127427508 | Intergenic | LIPA7  |
| 403 | chr7:143573631-143579649 | Intergenic | LIP2   |
| 404 | chr7:143743815-143749833 | Intergenic | LIP2   |
| 405 | chr7:150112496-150118514 | Intergenic | LIPA7  |
| 406 | chr7:150587461-150593479 | Intergenic | LIPA7  |
| 407 | chr7:153227724-153233742 | Intergenic | LIPA7  |
| 408 | chr7:17347180-17353198   | Intergenic | LIPA7  |

|     |                          |            |       |
|-----|--------------------------|------------|-------|
| 409 | chr7:18005668-18011686   | Intergenic | LIPA7 |
| 410 | chr7:21141918-21147936   | Intergenic | LIP3  |
| 411 | chr7:51921230-51927248   | Intergenic | LIPA7 |
| 412 | chr7:7082012-7088030     | Intergenic | LIPA7 |
| 413 | chr7:7294048-7300066     | Intergenic | LIPA7 |
| 414 | chr7:80684415-80690433   | Intergenic | LIPA7 |
| 415 | chr7:8091537-8097555     | Intergenic | LIPA7 |
| 416 | chr7:82485475-82491493   | Intergenic | LIP2  |
| 417 | chr7:83337038-83343056   | Intergenic | LIPA7 |
| 418 | chr7:84239322-84245340   | Intergenic | LIPA7 |
| 419 | chr7:86581218-86587236   | Intergenic | LIPA7 |
| 420 | chr7:89535376-89541394   | Intergenic | LIPA7 |
| 421 | chr7:92919434-92925452   | Intergenic | LIP3  |
| 422 | chr7:93116753-93122771   | Intergenic | LIPA7 |
| 423 | chr7:93163175-93169193   | Intergenic | LIP2  |
| 424 | chr7:94815055-94821073   | Intergenic | LIPA7 |
| 425 | chr7:97046299-97052317   | Intergenic | LIPA7 |
| 426 | chr8:107058006-107064024 | Intergenic | LIPA7 |
| 427 | chr8:108115761-108121779 | Intergenic | LIPA7 |
| 428 | chr8:111980990-111987008 | Intergenic | LIPA7 |
| 429 | chr8:122046769-122052787 | Intergenic | LIPA7 |
| 430 | chr8:126452654-126458672 | Intergenic | LIPA7 |
| 431 | chr8:139158413-139164431 | Intergenic | LIPA7 |
| 432 | chr8:16972571-16978589   | Intergenic | LIPA7 |
| 433 | chr8:19911040-19917058   | Intergenic | LIP2  |
| 434 | chr8:2332299-2338316     | Intergenic | LIPA7 |
| 435 | chr8:25518456-25524474   | Intergenic | LIPA7 |
| 436 | chr8:36001821-36007839   | Intergenic | LIPA7 |
| 437 | chr8:40959420-40965438   | Intergenic | LIPA7 |
| 438 | chr8:50949150-50955168   | Intergenic | LIPA8 |
| 439 | chr8:54972299-54978317   | Intergenic | LIPA7 |
| 440 | chr8:56630063-56636081   | Intergenic | LIPA7 |
| 441 | chr8:59487855-59493873   | Intergenic | LIPA7 |
| 442 | chr8:66223929-66229947   | Intergenic | LIPA7 |
| 443 | chr8:67754933-67760951   | Intergenic | LIP2  |
| 444 | chr8:69275599-69281617   | Intergenic | LIPA7 |
| 445 | chr8:72838670-72844688   | Intergenic | LIPA7 |
| 446 | chr8:74151920-74157938   | Intergenic | LIPA7 |
| 447 | chr8:74383908-74389926   | Intergenic | LIPA7 |
| 448 | chr8:75757672-75763690   | Intergenic | LIP2  |
| 449 | chr8:79530203-79536221   | Intergenic | LIPA7 |

|     |                          |            |       |
|-----|--------------------------|------------|-------|
| 450 | chr8:79553392-79559410   | Intergenic | LIPA7 |
| 451 | chr8:93051231-93057249   | Intergenic | LIPA7 |
| 452 | chr8:9811350-9817368     | Intergenic | LIPA7 |
| 453 | chr8:9834058-9840076     | Intergenic | LIPA7 |
| 454 | chr9:100172551-100178569 | Intergenic | LIPA7 |
| 455 | chr9:108707435-108713453 | Intergenic | LIP3  |
| 456 | chr9:111329707-111335725 | Intergenic | LIP3  |
| 457 | chr9:114865093-114871111 | Intergenic | LIP2  |
| 458 | chr9:11905138-11911156   | Intergenic | LIPA5 |
| 459 | chr9:13787039-13793057   | Intergenic | LIPA7 |
| 460 | chr9:15044859-15050877   | Intergenic | LIPA7 |
| 461 | chr9:21270426-21276444   | Intergenic | LIPA7 |
| 462 | chr9:21644579-21650597   | Intergenic | LIPA7 |
| 463 | chr9:23243152-23249170   | Intergenic | LIPA7 |
| 464 | chr9:26728299-26734317   | Intergenic | LIPA7 |
| 465 | chr9:27317361-27323379   | Intergenic | LIPA7 |
| 466 | chr9:31512117-31518135   | Intergenic | LIPA7 |
| 467 | chr9:4894811-4900829     | Intergenic | LIPA7 |
| 468 | chr9:7621897-7627915     | Intergenic | LIPA7 |
| 469 | chr9:73778418-73784436   | Intergenic | LIPA7 |
| 470 | chr9:75764668-75770686   | Intergenic | LIPA7 |
| 471 | chr9:82211329-82217347   | Intergenic | LIPA7 |
| 472 | chr9:84036809-84042827   | Intergenic | LIPA7 |
| 473 | chr9:85250880-85256898   | Intergenic | LIPA7 |
| 474 | chr9:85428828-85434846   | Intergenic | LIPA7 |
| 475 | chr9:91472382-91478400   | Intergenic | LIP3  |
| 476 | chrX:101562238-101568264 | Intergenic | LIP3  |
| 477 | chrX:106486561-106492579 | Intergenic | LIPA7 |
| 478 | chrX:108817951-108823969 | Intergenic | LIPA7 |
| 479 | chrX:109313644-109319662 | Intergenic | LIPA7 |
| 480 | chrX:110621729-110627747 | Intergenic | LIPA7 |
| 481 | chrX:114178894-114184912 | Intergenic | LIPA7 |
| 482 | chrX:114935947-114941965 | Intergenic | LIPA7 |
| 483 | chrX:115666999-115673017 | Intergenic | LIPA3 |
| 484 | chrX:117438834-117444852 | Intergenic | LIPA7 |
| 485 | chrX:117460941-117466959 | Intergenic | LIPA5 |
| 486 | chrX:117615811-117621829 | Intergenic | LIPA7 |
| 487 | chrX:120825787-120831805 | Intergenic | LIPA8 |
| 488 | chrX:122056462-122062480 | Intergenic | LIPA7 |
| 489 | chrX:122293316-122299334 | Intergenic | LIPA7 |
| 490 | chrX:122614576-122620594 | Intergenic | LIPA7 |

|     |                          |            |       |
|-----|--------------------------|------------|-------|
| 491 | chrX:131651590-131657606 | Intergenic | LIP3  |
| 492 | chrX:137124849-137130867 | Intergenic | LIPA7 |
| 493 | chrX:14364601-14370619   | Intergenic | LIPA7 |
| 494 | chrX:14728961-14734979   | Intergenic | LIP3  |
| 495 | chrX:155911089-155917107 | Intergenic | LIPA7 |
| 496 | chrX:23469637-23475655   | Intergenic | LIP3  |
| 497 | chrX:27294932-27300950   | Intergenic | LIPA7 |
| 498 | chrX:28450600-28456618   | Intergenic | LIPA7 |
| 499 | chrX:37523186-37529204   | Intergenic | LIP3  |
| 500 | chrX:39084222-39090240   | Intergenic | LIPA7 |
| 501 | chrX:3977414-3983432     | Intergenic | LIP3  |
| 502 | chrX:39273431-39279449   | Intergenic | LIPA7 |
| 503 | chrX:39537502-39543520   | Intergenic | LIPA6 |
| 504 | chrX:42809404-42815422   | Intergenic | LIPA6 |
| 505 | chrX:43920526-43926544   | Intergenic | LIPA7 |
| 506 | chrX:46082536-46088554   | Intergenic | LIPA7 |
| 507 | chrX:49292746-49298754   | Intergenic | LIP3  |
| 508 | chrX:54840265-54846283   | Intergenic | LIPA7 |
| 509 | chrX:55891784-55897802   | Intergenic | LIPA7 |
| 510 | chrX:57051417-57057435   | Intergenic | LIP3  |
| 511 | chrX:57266163-57272181   | Intergenic | LIP2  |
| 512 | chrX:57739536-57745554   | Intergenic | LIPA7 |
| 513 | chrX:57850400-57856418   | Intergenic | LIPA7 |
| 514 | chrX:58146029-58152047   | Intergenic | LIP3  |
| 515 | chrX:64654940-64660958   | Intergenic | LIP2  |
| 516 | chrX:65348874-65354892   | Intergenic | LIP3  |
| 517 | chrX:65562054-65568072   | Intergenic | LIPA7 |
| 518 | chrX:66714024-66720042   | Intergenic | LIPA8 |
| 519 | chrX:66794391-66800409   | Intergenic | LIPA7 |
| 520 | chrX:66853158-66859176   | Intergenic | LIP2  |
| 521 | chrX:67420091-67426109   | Intergenic | LIPA7 |
| 522 | chrX:67504609-67510627   | Intergenic | LIP3  |
| 523 | chrX:69241324-69247342   | Intergenic | LIPA7 |
| 524 | chrX:6968943-6974961     | Intergenic | LIP3  |
| 525 | chrX:71825358-71831376   | Intergenic | LIPA7 |
| 526 | chrX:73047785-73053803   | Intergenic | LIPA7 |
| 527 | chrX:73490769-73496787   | Intergenic | LIPA7 |
| 528 | chrX:73887927-73893945   | Intergenic | LIPA7 |
| 529 | chrX:75253521-75259539   | Intergenic | LIPA5 |
| 530 | chrX:75809593-75815611   | Intergenic | LIPA7 |
| 531 | chrX:75874376-75880394   | Intergenic | LIPA7 |

|     |                          |            |        |
|-----|--------------------------|------------|--------|
| 532 | chrX:76260385-76266403   | Intergenic | L1PA7  |
| 533 | chrX:76375109-76381127   | Intergenic | L1PA7  |
| 534 | chrX:76541343-76547365   | Intergenic | L1PA7  |
| 535 | chrX:76584360-76590375   | Intergenic | L1PA7  |
| 536 | chrX:77024771-77030789   | Intergenic | L1P2   |
| 537 | chrX:77190192-77196210   | Intergenic | L1PA7  |
| 538 | chrX:77278249-77284267   | Intergenic | L1P8A  |
| 539 | chrX:77404765-77410783   | Intergenic | L1PA7  |
| 540 | chrX:78225809-78231827   | Intergenic | L1PA7  |
| 541 | chrX:78367063-78373081   | Intergenic | L1PA7  |
| 542 | chrX:79006133-79012151   | Intergenic | L1PA7  |
| 543 | chrX:79213284-79219302   | Intergenic | L1P2   |
| 544 | chrX:79690013-79696031   | Intergenic | L1PA7  |
| 545 | chrX:80467888-80473906   | Intergenic | L1P3   |
| 546 | chrX:80961226-80967244   | Intergenic | L1P2   |
| 547 | chrX:81444670-81450688   | Intergenic | L1PA7  |
| 548 | chrX:83428732-83434750   | Intergenic | L1P2   |
| 549 | chrX:85399553-85405571   | Intergenic | L1PA7  |
| 550 | chrX:86891270-86897288   | Intergenic | L1PA15 |
| 551 | chrX:87248962-87254980   | Intergenic | L1PA7  |
| 552 | chrX:87773827-87779845   | Intergenic | L1P3   |
| 553 | chrX:8930128-8936146     | Intergenic | L1PA7  |
| 554 | chrX:89930549-89936567   | Intergenic | L1PA7  |
| 555 | chrX:90191372-90197390   | Intergenic | L1P2   |
| 556 | chrX:90971858-90977876   | Intergenic | L1P2   |
| 557 | chrX:91465205-91471223   | Intergenic | L1P3   |
| 558 | chrX:93656101-93662119   | Intergenic | L1PA7  |
| 559 | chrX:94837919-94843937   | Intergenic | L1PA7  |
| 560 | chrX:96209941-96215959   | Intergenic | L1PA7  |
| 561 | chrX:96422304-96428322   | Intergenic | L1PA7  |
| 562 | chrX:98042084-98048102   | Intergenic | L1PA7  |
| 563 | chrX:100207505-100213523 | Intergenic | L1PA7  |
| 564 | chrY:14764966-14770984   | Intergenic | L1PA7  |
| 565 | chrY:15336601-15342619   | Intergenic | L1PA7  |
| 566 | chrY:15811541-15817559   | Intergenic | L1PA8  |
| 567 | chrY:16784252-16790270   | Intergenic | L1P3   |
| 568 | chrY:16923384-16929402   | Intergenic | L1PA7  |
| 569 | chrY:17645801-17651819   | Intergenic | L1P2   |
| 570 | chrY:18248191-18254209   | Intergenic | L1P2   |
| 571 | chrY:18791992-18798010   | Intergenic | L1PA8  |
| 572 | chrY:19655263-19661281   | Intergenic | L1PA7  |

|     |                           |                                          |       |
|-----|---------------------------|------------------------------------------|-------|
| 573 | chrY:2824682-2830700      | Intergenic                               | LIP2  |
| 574 | chrY:3760340-3766358      | Intergenic                               | LIP2  |
| 575 | chrY:4547284-4553302      | Intergenic                               | LIP2  |
| 576 | chrY:6751398-6757416      | Intergenic                               | L1PA7 |
| 577 | chrY:6839567-6845585      | Intergenic                               | L1PA7 |
| 578 | chr1:107839711-107845729  | Intron of VAV3 gene                      | L1PA7 |
| 579 | chr1:113568919-113574937  | Intron of MAGI3 gene                     | L1PA8 |
| 580 | chr1:114962410-114968428  | Intron of SYCP1 gene                     | L1PA7 |
| 581 | chr1:153181432-153187450  | Intron of RP1-140J1.1 gene               | L1PA8 |
| 582 | chr1:166402659-166408677  | Intron of RP11-479J7 gene                | L1PA7 |
| 583 | chr1:166422190-166428208  | Intron of RP11-479J7.1 gene              | L1PA7 |
| 584 | chr1:168991330-168997348  | Intron of LINC00970 gene                 | L1PA7 |
| 585 | chr1:173024919-173030937  | Intron of RP1-15D23.2 gene               | L1PA7 |
| 586 | chr1:182214186-182220204  | Intron of LINC01344 gene                 | L1PA7 |
| 587 | chr1:183677898-183683916  | Intron of RGL1 gene                      | L1PA7 |
| 588 | chr1:183744292-183750310  | Intron of RGL1 gene                      | L1PA7 |
| 589 | chr1:207583879-207589897  | Intron of CR1 and RP11-78B10.2 gene      | L1PA7 |
| 590 | chr1:210880808-210886826  | Intron of KCNH1 gene                     | L1PA6 |
| 591 | chr1:210957703-210963721  | Intron of KCNH1 gene                     | L1PA6 |
| 592 | chr1:225006693-225012711  | Intron of DNAH4 gene                     | L1PA7 |
| 593 | chr1:242151086-242157104  | Intron of PLD5 and RP11-561I11.4 gene    | L1PA7 |
| 594 | chr1:242164818-242170836  | Intron of PLD5 and RP11-561I11.4 gene    | L1PA5 |
| 595 | chr1:247565934-247571952  | Intron of GCSAML and RP11-978I15.10 gene | L1PA8 |
| 596 | chr1:47148716-47154734    | Intron of CYP4A22-AS1 gene               | L1PA8 |
| 597 | chr1:49595362-49601380    | Intron of AGBL4 gene                     | LIP2  |
| 598 | chr1:49747801-49753819    | Intron of AGBL4 gene                     | LIP2  |
| 599 | chr1:59201904-59207922    | Intron of LINC01358 gene                 | L1PA7 |
| 600 | chr1:65547447-65553465    | Intron of LEPR gene                      | L1PA3 |
| 601 | chr1:89863370-89869388    | Intron of LRRC8D and RP11-302M6.4 gene   | LIP2  |
| 602 | chr1:92248179-92254197    | Intron of GLMN gene                      | L1PA7 |
| 603 | chr10:99170534-99176552   | Intron of HPSE2 gene                     | L1PA7 |
| 604 | chr10:130085828-130091846 | Intron of LINC00959 gene                 | L1PA7 |
| 605 | chr10:32709813-32715831   | Intron of CCDC7 gene                     | L1PA7 |
| 606 | chr10:5230184-5236202     | Intron of RP11-445P17.3 gene             | L1PA7 |
| 607 | chr10:66431419-66437437   | Intron of CTNNA3 gene                    | L1PA7 |
| 608 | chr10:67495696-67501714   | Intron of CTNNA3 gene                    | LIP3  |
| 609 | chr10:74601963-74607981   | Intron of ADK gene                       | L1PA7 |
| 610 | chr10:78661740-78667758   | Intron of RP11-90J7.3 gene               | L1PA7 |
| 611 | chr10:94696466-94702484   | Intron of RP11-400G3.5 and CYP2C18 gene  | LIP3  |
| 612 | chr10:95927113-95933131   | Intron of ENTPD1-AS1 and C10orf131 gene  | L1PA7 |
| 613 | chr11:100252199-100258217 | Intron of CNTN5 gene                     | L1PA7 |

|     |                           |                                      |        |
|-----|---------------------------|--------------------------------------|--------|
| 614 | chr11:103256112-103262130 | Intron of DYNC2H1 gene               | L1PA8  |
| 615 | chr11:108270091-108276109 | Intron of ATM gene                   | L1P3   |
| 616 | chr11:108418317-108424335 | Intron of C11orf65 gene              | L1PA7  |
| 617 | chr11:120759189-120765207 | Intron of GRIK4 gene                 | L1PA7  |
| 618 | chr11:131266484-131272502 | Intron of AP002856.5 gene            | L1PA7  |
| 619 | chr11:132755539-132761557 | Intron of OPCML gene                 | L1PA7  |
| 620 | chr11:13985307-13991325   | Intron of SPON1 gene                 | L1PA7  |
| 621 | chr11:19407336-19413354   | Intron of NAV2 gene                  | L1PA7  |
| 622 | chr11:21198342-21204360   | Intron of NELL1 gene                 | L1PA7  |
| 623 | chr11:31176003-31182021   | Intron of DCDC1 gene                 | L1PA7  |
| 624 | chr11:40187868-40193886   | Intron of LRRC4C gene                | L1P3   |
| 625 | chr11:40464796-40470814   | Intron of LRRC4C gene                | L1PA7  |
| 626 | chr11:42200744-42206762   | Intron of CTD-2572N17.1 gene         | L1PA7  |
| 627 | chr11:4392272-4398290     | Intron of TRIM21 gene                | L1P2   |
| 628 | chr11:58525469-58531487   | Intron of LPXN gene                  | L1PA7  |
| 629 | chr11:63388025-63394043   | Intron of SLC22A9 gene               | L1P2   |
| 630 | chr11:85413663-85419681   | Intron of DLG2 gene                  | L1PA7  |
| 631 | chr11:86536566-86542584   | Intron of ME3 and RP11-317J19.1 gene | L1PA7  |
| 632 | chr11:88720300-88726318   | Intron of GRM5 gene                  | L1PA7  |
| 633 | chr11:92424109-92430127   | Intron of FAT3 gene                  | L1PA7  |
| 634 | chr11:96482369-96488387   | Intron of KRKL-AS1 gene              | L1PA6  |
| 635 | chr12:101055614-101061632 | Intron of ANO4 gene                  | L1PA7  |
| 636 | chr12:107854775-107860793 | Intron of RP11-554D14.6 gene         | L1P2   |
| 637 | chr12:23817847-23823865   | Intron of SOX5 gene                  | L1PA7  |
| 638 | chr12:32422759-32428777   | Intron of FGD4 gene                  | L1PA7  |
| 639 | chr12:43380718-43386736   | Intron of ADAMTS20 gene              | L1PA7  |
| 640 | chr12:44893019-44899037   | Intron of NELL2 gene                 | L1PA7  |
| 641 | chr12:46594315-46600333   | Intron of RP11-96H19.1 gene          | L1PA7  |
| 642 | chr12:48269167-48275185   | Intron of RP11-370I10.2 gene         | L1MC2  |
| 643 | chr12:62106715-62112733   | Intron of FAM19A2 gene               | L1PA7  |
| 644 | chr12:65396344-65402362   | Intron of MSRB3 gene                 | L1PA7  |
| 645 | chr13:19647819-19653837   | Intron of MPHOSPH8 gene              | L1P3   |
| 646 | chr13:23589521-23595539   | Intron of TNFRSF19 gene              | L1P3   |
| 647 | chr13:29031744-29037762   | Intron of MTUS2 gene                 | L1P2   |
| 648 | chr13:35314827-35320845   | Intron of NBEA gene                  | L1PA7  |
| 649 | chr13:38832693-38838711   | Intron of FREM2 gene                 | L1P3   |
| 650 | chr13:46213334-46219352   | Intron of LRRC63 gene                | L1PA8A |
| 651 | chr13:46401796-46407814   | Intron of KIAA0226L gene             | L1P3   |
| 652 | chr13:49113751-49119769   | Intron of FNDC3A gene                | L1PA7  |
| 653 | chr13:51978327-51984345   | Intron of ATP7B gene                 | L1PA7  |
| 654 | chr13:60499793-60505811   | Intron of TDRD3 gene                 | L1P2   |



|     |                          |                                        |       |
|-----|--------------------------|----------------------------------------|-------|
| 655 | chr13:71123727-71129745  | Intron of LINC00348 gene               | L1PA7 |
| 656 | chr14:31661282-31667300  | Intron of NUBPL gene                   | L1PA7 |
| 657 | chr14:31811092-31817110  | Intron of NUBPL gene                   | L1PA7 |
| 658 | chr14:36154956-36160974  | Intron of LINC00609 and PTCSC3 gene    | L1PA7 |
| 659 | chr14:37625845-37631863  | Intron of TTC6 gene                    | L1PA7 |
| 660 | chr14:42640336-42646354  | Intron of CTD-2307P3.1 gene            | L1P2  |
| 661 | chr14:44017231-44023249  | Intron of RP11-305B6.3 gene            | L1PA7 |
| 662 | chr14:49057177-49063195  | Intron of RP11-816J8.1 gene            | L1PA7 |
| 663 | chr14:52563703-52569721  | Intron of GPR137 gene                  | L1PA7 |
| 664 | chr14:53793583-53799601  | Intron of AL162759.1 gene              | L1PA7 |
| 665 | chr14:54400571-54406589  | Intron of CDKN3 gene                   | L1P2  |
| 666 | chr14:66582648-66588666  | Intron of GPHN gene                    | L1PA7 |
| 667 | chr14:71077582-71083600  | Intron of PCNX gene                    | L1PA7 |
| 668 | chr14:85365665-85371683  | Intron of CTD-2128A3.2 gene            | L1PA7 |
| 669 | chr14:97669978-97675996  | Intron of RP11-76E12.1 gene            | L1PA7 |
| 670 | chr15:22111695-22117713  | Intron of RP11-69H14.6 gene            | L1PA7 |
| 671 | chr15:37403560-37409578  | Intron of RP11-720L8.1 gene            | L1PA7 |
| 672 | chr15:46736425-46742443  | Intron of RP11-627D16.1 gene           | L1PA7 |
| 673 | chr15:49961535-49967553  | Intron of ATP8B4 gene                  | L1PA7 |
| 674 | chr15:56144976-56150994  | Intron of RFX7 gene                    | L1PA7 |
| 675 | chr15:76091835-76097853  | Intron of TMEM266 gene                 | L1PA7 |
| 676 | chr15:86414871-86420889  | Intron of AGBL1 gene                   | L1PA7 |
| 677 | chr15:86460224-86466242  | Intron of AGBL1 gene                   | L1PA7 |
| 678 | chr16:10445552-10451570  | Intron of ATF7IP2 gene                 | L1P2  |
| 679 | chr16:58913402-58919420  | Intron of RP11-410D17.2 gene           | L1PA7 |
| 680 | chr17:55101168-55107186  | Intron of STXB4 gene                   | L1PA7 |
| 681 | chr18:34682875-34688893  | Intron of DTNA gene                    | L1PA7 |
| 682 | chr18:36872747-36878765  | Intron of KIAA1328 gene                | L1PA7 |
| 683 | chr18:36955227-36961245  | Intron of KIAA1328 gene                | L1P2  |
| 684 | chr18:3692874-3698892    | Intron of DLGAP1 gene                  | L1PA7 |
| 685 | chr18:44359718-44365736  | Intron of LINC01478 gene               | L1PA7 |
| 686 | chr18:44411634-44417652  | Intron of LINC01478 gene               | L1PA7 |
| 687 | chr18:45470713-45476731  | Intron of SLC14A2 and SLC14A2-AS1 gene | L1PA7 |
| 688 | chr18:53489844-53495862  | Intron of DCC gene                     | L1PA7 |
| 689 | chr18:70090029-70096047  | Intron of RTTN gene                    | L1P2  |
| 690 | chr18:7706781-7712799    | Intron of PTPRM gene                   | L1P3  |
| 691 | chr18:7861928-7867946    | Intron of PTPRM gene                   | L1PA7 |
| 692 | chr18:8144378-8150396    | Intron of PTPRM gene                   | L1PA7 |
| 693 | chr19:22973275-22979293  | Intron of ZNF278 gene                  | L1PA7 |
| 694 | chr19:53203049-53209067  | Intron of CTD-2245F17.3 gene           | L1PA7 |
| 695 | chr2:102639714-102645732 | Intron of SLC9A2 gene                  | L1PA8 |

|     |                          |                                      |        |
|-----|--------------------------|--------------------------------------|--------|
| 696 | chr2:135511004-135517022 | Intron of ZRANB3 gene                | LIP3   |
| 697 | chr2:137096799-137102817 | Intron of THSD7B gene                | L1PA7  |
| 698 | chr2:141336634-141342652 | Intron of LPR1B gene                 | LIP2   |
| 699 | chr2:141441144-141447162 | Intron of LPR1B gene                 | L1PA7  |
| 700 | chr2:144780684-144786702 | Intron of TEX41 gene                 | LIP3   |
| 701 | chr2:148306382-148312400 | Intron of MBD5 gene                  | L1PA7  |
| 702 | chr2:148357757-148363775 | Intron of MBD5 gene                  | L1PA7  |
| 703 | chr2:150187586-150193604 | Intron of AC016682 gene              | L1PA7  |
| 704 | chr2:159351383-159357401 | Intron of BAZ2B gene                 | L1PA7  |
| 705 | chr2:159817360-159823378 | Intron of LY75and LY75-CD302 gene    | L1PA7  |
| 706 | chr2:160176405-160182423 | Intron of ITGB6 gene                 | L1PA7  |
| 707 | chr2:167092279-167098297 | Intron of XIRP2 gene                 | L1PA7  |
| 708 | chr2:177366930-177372948 | Intron of NFE2L2 and AC074286.1 gene | L1PA8  |
| 709 | chr2:178961014-178967032 | Intron of CCDC141 gene               | L1PA7  |
| 710 | chr2:181084633-181090651 | Intron of AC068196.1 gene            | L1PA7  |
| 711 | chr2:190549583-190555601 | Intron of AC093388.3 gene            | L1PA7  |
| 712 | chr2:19013273-19019306   | Intron of LINC01376 gene             | L1PA7  |
| 713 | chr2:19013273-19019306   | Intron of LINC01376 gene             | L1PA7  |
| 714 | chr2:195946663-195952681 | Intron of DNAH7 gene                 | L1PA7  |
| 715 | chr2:198013648-198019666 | Intron of PLCL1 gene                 | L1PA7  |
| 716 | chr2:198680206-198686224 | Intron of ACAC019330.1 gene          | L1PA7  |
| 717 | chr2:210176725-210182743 | Intron of AC006994.2 gene            | L1PA7  |
| 718 | chr2:212748184-212754202 | Intron of AC079610.1 gene            | LIP2   |
| 719 | chr2:215814741-215820759 | Intron of LINC00607 gene             | L1PA7  |
| 720 | chr2:215983807-215989825 | Intron of MREG gene                  | L1PA7  |
| 721 | chr2:216975438-216981456 | Intron of AC007563.5 gene            | L1PA7  |
| 722 | chr2:224480529-224486547 | Intron of CUL3 gene                  | LIP3   |
| 723 | chr2:229376679-229382697 | Intron of DNER3 gene                 | L1PA7  |
| 724 | chr2:34461922-34467940   | Intron of AC073218.1 gene            | L1PA7  |
| 725 | chr2:51886728-51892746   | Intron of AC007682.1 gene            | LIP2   |
| 726 | chr2:58163815-58169833   | Intron of FANCL gene                 | LIP2   |
| 727 | chr2:58683906-58689924   | Intron of LINC01122 gene             | L1PA7  |
| 728 | chr2:62615138-62621156   | Intron of AC092155.4 gene            | L1PA7  |
| 729 | chr2:62628684-62634702   | Intron of AC092155.4 gene            | L1PA7  |
| 730 | chr2:63501846-63507864   | Intron of WDPCP gene                 | L1PA7  |
| 731 | chr2:72430632-72436650   | Intron of EXOC6B gene                | L1PA7  |
| 732 | chr2:97868135-97874153   | Intron of TMEM131 gene               | L1PA7  |
| 733 | chr2:99128313-99134331   | Intron of TSGA10 gene                | L1PA7  |
| 734 | chr20:13047801-13053819  | Intron of SPTLC3 gene                | LIP3   |
| 735 | chr20:14021191-14027209  | Intron of MACROD2 gene               | L1PA10 |
| 736 | chr20:14463659-14469677  | Intron of MACROD2 gene               | LIP3   |

|     |                          |                                         |       |
|-----|--------------------------|-----------------------------------------|-------|
| 737 | chr20:14801854-14807872  | Intron of MACROD2 gene                  | L1PA7 |
| 738 | chr20:1539347-1545365    | Intron of SIRPD gene                    | L1PA7 |
| 739 | chr20:16515431-16521449  | Intron of KIF16B gene                   | L1PA7 |
| 740 | chr20:3517327-3523345    | Intron of ATRN gene                     | L1PA7 |
| 741 | chr21:17768479-17774497  | Intron of C21orf91-OT1 gene             | L1PA7 |
| 742 | chr22:16970431-16976449  | Intron of GAB4 gene                     | L1PA7 |
| 743 | chr22:28604984-28611002  | Intron of TTC28 gene                    | L1PA6 |
| 744 | chr22:33635793-33641811  | Intron of LARGE gene                    | L1PA8 |
| 745 | chr3:101232132-101238150 | Intron of IMPG2 gene                    | L1PA7 |
| 746 | chr3:114527402-114533420 | Intron of ZBTB20 gene                   | L1PA7 |
| 747 | chr3:121209935-121215953 | Intron of STXBP5L gene                  | L1PA7 |
| 748 | chr3:121257724-121263742 | Intron of STXBP5L gene                  | L1PA7 |
| 749 | chr3:121806682-121812700 | Intron of IQCB1 gene                    | L1PA8 |
| 750 | chr3:132601536-132607554 | Intron of ACAD11 gene                   | L1PA7 |
| 751 | chr3:13729132-13735150   | Intron of LINC00620 gene                | L1PA7 |
| 752 | chr3:138556116-138562134 | Intron of CEP70 gene                    | L1PA7 |
| 753 | chr3:14187509-14193527   | Intron of LSM3 gene                     | L1PA7 |
| 754 | chr3:151880557-151886575 | Intron of AADACL2-AS1 gene              | L1P3  |
| 755 | chr3:152366033-152372051 | Intron of MBNL1 gene                    | L1PA7 |
| 756 | chr3:158059808-158065826 | Intron of RP11-290K4.2 gene             | L1P2  |
| 757 | chr3:159686456-159692474 | Intron of IQCJ-SCHIP1 gene              | L1PA7 |
| 758 | chr3:163292174-163298192 | Intron of LINC01192 gene                | L1PA7 |
| 759 | chr3:170614366-170620404 | Intron of CLDN11 gene                   | L1PA7 |
| 760 | chr3:170614386-170620404 | Intron of CLDN11 gene                   | L1PA7 |
| 761 | chr3:17444646-17450664   | Intron of TBC1D5 gene                   | L1PA7 |
| 762 | chr3:178356524-178362542 | Intron of RP11-33A14.1 gene             | L1PA7 |
| 763 | chr3:189251738-189257756 | Intron of TPRG1 gene                    | L1PA7 |
| 764 | chr3:29978143-29984161   | Intron of RBMS3 gene                    | L1PA7 |
| 765 | chr3:36503634-36509652   | Intron of STAC gene                     | L1PA7 |
| 766 | chr3:37653411-37659429   | Intron of ITGA9 gene                    | L1PA7 |
| 767 | chr3:41366056-41372074   | Intron of ULK4 gene                     | L1PA7 |
| 768 | chr3:41920761-41926779   | Intron of ULK4 gene                     | L1PA7 |
| 769 | chr3:42852937-42858955   | Intron of ACKR2, KRBOX1 and CYP8B1 gene | L1PA7 |
| 770 | chr3:46785358-46791376   | Intron of PRSS50 gene                   | L1PA7 |
| 771 | chr3:50894208-50900226   | Intron of DOCK3 gene                    | L1PA7 |
| 772 | chr3:51090373-51096391   | Intron of DOCK3 gene                    | L1P3  |
| 773 | chr3:54716143-54722161   | Intron of CACNA2D3 gene                 | L1P3  |
| 774 | chr3:58937985-58944003   | Intron of C3orf67 and C3orf67-AS1 gene  | L1P3  |
| 775 | chr3:61115006-61121024   | Intron of FHIT gene                     | L1PA7 |
| 776 | chr3:66305222-66311240   | Intron of SLC25A26 gene                 | L1PA8 |
| 777 | chr3:67774323-67780341   | Intron of SUCLG2-AS1 gene               | L1PA7 |

|     |                          |                                          |       |
|-----|--------------------------|------------------------------------------|-------|
| 778 | chr3:68385273-68391291   | Intron of FAM19A1 gene                   | L1PA7 |
| 779 | chr3:8367296-8373314     | Intron of LMCD1-AS1 gene                 | L1PA7 |
| 780 | chr3:84756423-84762441   | Intron of LINC00971 gene                 | L1PA7 |
| 781 | chr3:811901-817919       | Intron of LINC01266 gene                 | L1PA7 |
| 782 | chr4:99240937-99246955   | Intron of RP11-696N14.1 gene             | L1PA7 |
| 783 | chr4:99256530-99262548   | Intron of RP11-696N14.1 gene             | L1PA6 |
| 784 | chr4:104247356-104253374 | Intron of RP11-729M20.1 gene             | L1P2  |
| 785 | chr4:127070064-127076082 | Intron of RP11-810P8.1 gene              | L1P3  |
| 786 | chr4:131396312-131402330 | Intron of RP11-314N14.1 gene             | L1PA7 |
| 787 | chr4:134779898-134785916 | Intron of CTD-2012I17.1 gene             | L1PA7 |
| 788 | chr4:138778352-138784370 | Intron of RP11-9802.1 gene               | L1PA7 |
| 789 | chr4:141106957-141112975 | Intron of RNF150 gene                    | L1PA7 |
| 790 | chr4:146799649-146805667 | Intron of TTC29 gene                     | L1PA7 |
| 791 | chr4:150266726-150272744 | Intron of LRBA gene                      | L1PA7 |
| 792 | chr4:151590756-151596774 | Intron of FAM160A1 gene                  | L1PA7 |
| 793 | chr4:158895718-158901736 | Intron of FNIP2 and C4orf45 gene         | L1PA7 |
| 794 | chr4:165894969-165900987 | Intron of TLL1 gene                      | L1PA7 |
| 795 | chr4:2915864-2921882     | Intron of ADD1 gene                      | L1PA7 |
| 796 | chr4:33859347-33865365   | Intron of RP11-79E3.2 gene               | L1PA7 |
| 797 | chr4:37347576-37353594   | Intron of NWD2 gene                      | L1PA7 |
| 798 | chr4:37403421-37409439   | Intron of NWD2 gene                      | L1PA7 |
| 799 | chr4:57465197-57471215   | Intron of RP11-319E12.1 gene             | L1PA7 |
| 800 | chr4:59553229-59559247   | Intron of RP11-725D20.1 gene             | L1PA7 |
| 801 | chr4:59576992-59583010   | Intron of RP11-725D20.1 gene             | L1P3  |
| 802 | chr4:59775518-59781536   | Intron of RP11-525J21.1 gene             | L1PA7 |
| 803 | chr4:70459659-70465677   | Intron of MUC7 gene                      | L1PA7 |
| 804 | chr4:72115162-72121180   | Intron of NPFFR2 gene                    | L1P3  |
| 805 | chr4:75413655-75419673   | Intron of RP11-567N4.2 gene              | L1PA7 |
| 806 | chr4:81178903-81184921   | Intron of RP11-100N20.1 and PRKG2 gene   | L1P3  |
| 807 | chr4:81469050-81475068   | Intron of RASGEF1B gene                  | L1PA7 |
| 808 | chr4:81710643-81716661   | Intron of RP11-689K5.3 gene              | L1PA7 |
| 809 | chr4:84281342-84287360   | Intron of RP11-8L2.1 gene                | L1PA7 |
| 810 | chr4:86186504-86192522   | Intron of MAPK10 and RP11-778J15.1 gene  | L1PA7 |
| 811 | chr4:87481826-87487844   | Intron of SPARCL1 gene                   | L1PA7 |
| 812 | chr4:87631543-87637561   | Intron of RP11-742B18.1 gene             | L1PA8 |
| 813 | chr4:89561315-89567333   | Intron of RP11-115D19.1 gene             | L1P2  |
| 814 | chr4:98529765-98535783   | Intron of TSPAN5 gene                    | L1PA7 |
| 815 | chr5:106834140-106840158 | Intron of CTC-254B4.1 gene               | L1PA7 |
| 816 | chr5:115875932-115881950 | Intron of AP3S1 gene                     | L1PA7 |
| 817 | chr5:147603917-147609935 | Intron of JAKMIP2 and JAKMIP2-AS1 gene   | L1PA7 |
| 818 | chr5:148274015-148280033 | Intron of SPINK13 and RP11-373N22.3 gene | L1PA7 |

|     |                          |                                      |       |
|-----|--------------------------|--------------------------------------|-------|
| 819 | chr5:152019426-152025444 | Intron of CTB-1202.1 gene            | L1PA7 |
| 820 | chr5:152153016-152159034 | Intron of CTB-1202.1 gene            | L1PA8 |
| 821 | chr5:158939914-158945932 | Intron of EBF1 gene                  | L1PA7 |
| 822 | chr5:163041369-163047387 | Intron of RP11-541P9.3 gene          | L1PA7 |
| 823 | chr5:167953431-167959449 | Intron of TENM2 gene                 | L1PA7 |
| 824 | chr5:170896254-170902272 | Intron of RANBP17 gene               | L1PA7 |
| 825 | chr5:171213623-171219641 | Intron of RANBP17 gene               | L1PA8 |
| 826 | chr5:20810021-20816039   | Intron of RP11-774D14.1 gene         | L1P3  |
| 827 | chr5:37649669-37655687   | Intron of WDR70 gene                 | L1PA7 |
| 828 | chr5:59627149-59633167   | Intron of PDE4D gene                 | L1PA7 |
| 829 | chr5:64932838-64938856   | Intron of CWC27 gene                 | L1PA7 |
| 830 | chr5:7155546-7161564     | Intron of RP11-122F24.1 gene         | L1P3  |
| 831 | chr5:72801768-72807786   | Intron of CTD-2631K10.1 gene         | L1PA7 |
| 832 | chr5:72975678-72981696   | Intron of FCHO2 gene                 | L1PA7 |
| 833 | chr5:81368753-81374771   | Intron of ACOT12 gene                | L1PA7 |
| 834 | chr5:94289152-94295170   | Intron of KIAA0825 gene              | L1PA7 |
| 835 | chr5:94950679-94956697   | Intron of MCTP1 gene                 | L1PA7 |
| 836 | chr6:109674366-109680384 | Intron of AK9 gene                   | L1PA7 |
| 837 | chr6:118833156-118839174 | Intron of MCM9 gene                  | L1AP7 |
| 838 | chr6:143850166-143856184 | Intron of LTV1 gene                  | L1PA7 |
| 839 | chr6:149888508-149894526 | Intron of RAET1E and RAET1E-AS1 gene | L1PA6 |
| 840 | chr6:1746297-1752315     | Intron of GMDS gene                  | L1P3  |
| 841 | chr6:32256120-32262138   | Intron of XXbac-BPG154L12.5 gene     | L1PA7 |
| 842 | chr6:54322885-54328903   | Intron of TINAG gene                 | L1PA7 |
| 843 | chr6:55119847-55125865   | Intron of HCRTR2 gene                | L1PA7 |
| 844 | chr6:55153749-55159767   | Intron of HCRTR2 gene                | L1PA7 |
| 845 | chr6:56183380-56189398   | Intron of COL21A1 gene               | L1PA7 |
| 846 | chr6:56199396-56205414   | Intron of COL21A1 gene               | L1PA7 |
| 847 | chr6:64563405-64569423   | Intron of EYS gene                   | L1PA7 |
| 848 | chr6:65369790-65375808   | Intron of EYS gene                   | L1PA8 |
| 849 | chr6:83316567-83322585   | Intron of ME1 gene                   | L1PA7 |
| 850 | chr7:103455477-103461495 | Intron of CTB-107G13.1 gene          | L1P3  |
| 851 | chr7:106488301-106494319 | Intron of CTB-111H14.1 gene          | L1PA7 |
| 852 | chr7:107527577-107533595 | Intron of COG5 gene                  | L1PA7 |
| 853 | chr7:10737330-10743348   | Intron of CTD-2060L22.1 gene         | L1P3  |
| 854 | chr7:108210645-108216663 | Intron of NRCAM gene                 | L1P3  |
| 855 | chr7:11384335-11393795   | Intron of AC004538.3 and THSD7A gene | L1PA7 |
| 856 | chr7:11387777-11393795   | Intron of AC004538.3 and THSD7A gene | L1PA7 |
| 857 | chr7:116738451-116744469 | Intron of MET gene                   | L1PA7 |
| 858 | chr7:121286247-121292265 | Intron of CPED1 gene                 | L1PA7 |
| 859 | chr7:133963072-133969090 | Intron of EXOC4 gene                 | L1PA7 |

|     |                          |                                       |        |
|-----|--------------------------|---------------------------------------|--------|
| 860 | chr7:136426623-136432641 | Intron of AC009784.3 gene             | L1PA7  |
| 861 | chr7:137098745-137104763 | Intron of AC009264.1 gene             | L1PA7  |
| 862 | chr7:13666750-13672768   | Intron of AC011288.2 gene             | L1PA7  |
| 863 | chr7:142205603-142211621 | Intron of MGAM2 gene                  | L1PA7  |
| 864 | chr7:153976276-153982294 | Intron of DPP6 gene                   | L1PA7  |
| 865 | chr7:16158241-16164259   | Intron of ISPD gene                   | L1PA7  |
| 866 | chr7:17802366-17808384   | Intron of SNX13 gene                  | L1PA7  |
| 867 | chr7:21922715-21928733   | Intron of CDCA7L gene                 | L1PA7  |
| 868 | chr7:23772564-23778582   | Intron of STK31 gene                  | L1PA6  |
| 869 | chr7:27849094-27855112   | Intron of JAZF1 gene                  | L1PA7  |
| 870 | chr7:36251555-36257573   | Intron of EEPD1 gene                  | L1PA7  |
| 871 | chr7:50036085-50042103   | Intron of ZBPB gene                   | L1PA7  |
| 872 | chr7:7386707-7392725     | Intron of COL28A1 gene                | L1PA7  |
| 873 | chr7:7655046-7661064     | Intron of RPA3 and UMAD1 gene         | L1PA7  |
| 874 | chr7:79064338-79070356   | Intron of MAGI2 gene                  | L1PA7  |
| 875 | chr7:8731865-8737883     | Intron of NXP1 gene                   | L1PA7  |
| 876 | chr7:94962873-94968891   | Intron of PPP1R9A gene                | L1PA7  |
| 877 | chr7:95019805-95025823   | Intron of PPP1R9A gene                | L1PA7  |
| 878 | chr8:99409139-99415157   | Intron of VPS13B gene                 | L1PA7  |
| 879 | chr8:99823327-99829345   | Intron of VPS13B gene                 | L1PA7  |
| 880 | chr8:105892442-105898460 | Intron of ZFPM2-AS1 gene              | L1P3   |
| 881 | chr8:106556382-106562400 | Intron of OXR1 and RP11-649G15.2 gene | L1PA7  |
| 882 | chr8:108979295-108985313 | Intron of RP11-1084E5.1 gene          | L1PA7  |
| 883 | chr8:109667942-109673960 | Intron of SYBU gene                   | L1P3   |
| 884 | chr8:112869652-112875670 | Intron of CSMD3 gene                  | L1PA7  |
| 885 | chr8:32249941-32255959   | Intron of NRG1 gene                   | L1P2   |
| 886 | chr8:4566849-4572867     | Intron of CSMD1 gene                  | L1PA7  |
| 887 | chr8:50729534-50735552   | Intron of SNTG1 gene                  | L1P2   |
| 888 | chr8:53195461-53201479   | Intron of RP11-162D9.3 gene           | L1P2   |
| 889 | chr8:53927521-53933539   | Intron of RGS20 gene                  | L1PA7  |
| 890 | chr8:60443475-60449493   | Intron of LINC01301 gene              | L1PA7  |
| 891 | chr8:67533730-67539748   | Intron of CPA6 gene                   | L1PA7  |
| 892 | chr8:81161076-81167094   | Intron of RP11-1149M10.2 gene         | L1PA7  |
| 893 | chr8:82529084-82535102   | Intron of RP11-653B10.1 gene          | L1PA7  |
| 894 | chr8:88520605-88526623   | Intron of RP11-586K2.1 gene           | L1PA13 |
| 895 | chr9:10295682-10301700   | Intron of PTRD gene                   | L1PA7  |
| 896 | chr9:100230089-100236107 | Intron of INVS gene                   | L1PA7  |
| 897 | chr9:105511087-105517105 | Intron of FSD1L gene                  | L1P2   |
| 898 | chr9:119497591-119503609 | Intron of RP11-295D22.1 gene          | L1PA7  |
| 899 | chr9:135836261-135842279 | Intron of CAMSAP1 gene                | L1PA7  |
| 900 | chr9:18960472-18966490   | Intron of SAX01 gene                  | L1PA7  |

|     |                          |                              |       |
|-----|--------------------------|------------------------------|-------|
| 901 | chr9:19760028-19766046   | Intron of SLC24A2 gene       | L1PA7 |
| 902 | chr9:4246339-4252357     | Intron of GLIS3 gene         | L1PA7 |
| 903 | chr9:68585920-68591938   | Intron of RP11-274B18.4 gene | L1PA7 |
| 904 | chr9:86083489-86089507   | Intron of GOLM1 gene         | L1PA7 |
| 905 | chrX:102862912-102868930 | Intron of LINC00630 gene     | L1P2  |
| 906 | chrX:104137514-104143532 | Intron of SLC25A53 gene      | L1PA3 |
| 907 | chrX:104603582-104609600 | Intron of IL1RAPL2 gene      | L1P2  |
| 908 | chrX:104821858-104827876 | Intron of IL1RAPL2 gene      | L1P3  |
| 909 | chrX:11017526-11023544   | Intron of RP11-120D5 gene    | L1PA5 |
| 910 | chrX:113818277-113824294 | Intron of XACT gene          | L1PA7 |
| 911 | chrX:117937559-117943577 | Intron of KLHL13 gene        | L1PA7 |
| 912 | chrX:130809160-130815178 | Intron of ENOX2 gene         | L1PA7 |
| 913 | chrX:132444396-132450414 | Intron of MBNL3 gene         | L1PA8 |
| 914 | chrX:132858513-132864531 | Intron of HS6ST2 gene        | L1P2  |
| 915 | chrX:139058903-139064921 | Intron of FGF13 gene         | L1P2  |
| 916 | chrX:139152738-139158756 | Intron of FGF13 gene         | L1PA7 |
| 917 | chrX:148774480-148780498 | Intron of AFF2 gene          | L1PA7 |
| 918 | chrX:21540334-21546352   | Intron of CNKSR2 gene        | L1PA7 |
| 919 | chrX:31463902-31469920   | Intron of DMD gene           | L1PA7 |
| 920 | chrX:32799375-32805393   | Intron of DMD gene           | L1P2  |
| 921 | chrX:42336098-42342116   | Intron of RP1-154K9.2 gene   | L1PA7 |
| 922 | chrX:42502427-42508445   | Intron of RP1-154K9.2 gene   | L1PA7 |
| 923 | chrX:43720405-43726423   | Intron of MAOA gene          | L1PA7 |
| 924 | chrX:44248534-44254552   | Intron of EFHC2 gene         | L1PA7 |
| 925 | chrX:51120633-51126651   | Intron of LINC01284 gene     | L1P3  |
| 926 | chrX:68523210-68529228   | Intron of YIPF6 gene         | L1PA7 |
| 927 | chrX:74039303-74045321   | Intron of JPX and FTX gene   | L1PA7 |
| 928 | chrX:86330988-86337006   | Intron of DACH2 gene         | L1PA7 |
| 929 | chrX:98691843-98697861   | Intron of RPI1-485F13.1 gene | L1P3  |
| 930 | chrY:18516395-18522413   | Intron of AC022486.1 gene    | L1PA8 |
| 931 | chrY:18951395-18957413   | Intron of TTTY14 gene        | L1PA7 |
| 932 | chrY:57097609-57103627   | Intron of VAMP7 gene         | L1PA7 |
| 933 | chr6:115930738-115936756 | Exon of FRK gene             | L1PA7 |
